1 **The Biological Evaluation of Fusidic Acid and Its Hydrogenation**

2 **Derivative as Antimicrobial and Anti-inflammatory Agents**

3 Pan-Pan Wu<sup>1, 2, 3</sup>, Hao He<sup>1, 3</sup>, W. David Hong<sup>1, 3, 4, 5</sup>, Tong-Rong Wu<sup>1, 3</sup>, Su-Qing Zhao<sup>1, 2, 3\*</sup>,

4 Xi-Ping Cui<sup>2</sup>, Ying-Ying Zhong<sup>2</sup>, Dong-Li Li<sup>1, 3</sup>, Xue-Tao Xu<sup>1, 3</sup>, Zhao-Jun Sheng<sup>1, 3</sup>, Bo-Rong

5 Tu<sup>1, 3</sup>, Min Gao<sup>1, 3</sup>, Jun Zhou<sup>1, 3</sup>, Stephen A. Ward<sup>4</sup>, Paul M. O'Neill<sup>5</sup>, Kun Zhang<sup>1, 2, 3\*</sup>

6 <sup>1</sup> *Faculty of Chemical & Environmental Engineering, Wuyi University, Jiangmen, 529020, China*

7 <sup>2</sup> *Department of Pharmaceutical Engineering, Faculty of Chemical Engineering and Light*

8 *Industry, Guangdong University of Technology, Guangzhou, 510006, China*

9 <sup>3</sup> *International Healthcare Innovation Institute (Jiangmen), Jiangmen, 529020, China*

10 <sup>4</sup> *Research Centre for Drugs and Diagnostics, Liverpool School of Tropical Medicine, Liverpool,*

11 *L3 5QA, United Kingdom*

12 <sup>5</sup> *Department of chemistry, University of Liverpool, Liverpool, L69 7ZD, United Kingdom*

13 *\*Joint Corresponding Authors: Su-Qing Zhao, telephone: +86 15820258676, email:*

14 *sqzhao@gdut.edu.cn; Kun Zhang, telephone: +86 13822330019, email: kzhang@gdut.edu.cn*

15 **Running title:** Difunctional Bioactivity of FA and Its Derivative

16 **Key words:** fusidic acid; derivative; antimicrobial; anti-inflammatory

17

18 **Abstract**

19 Fusidic acid (WU-FA-00) is the only commercially available antimicrobial from  
20 the fusidane family that has a narrow spectrum of activity against Gram-positive  
21 bacteria. Herein, the hydrogenation derivative (WU-FA-01) of fusidic acid was  
22 prepared, and both compounds were examined against a panel of six bacterial strains.  
23 In addition, their anti-inflammation properties were evaluated using a  
24 12-*O*-tetradecanoylphorbol-13-acetate (TPA)-induced mouse ear edema model. The  
25 results of the antimicrobial assay revealed that both WU-FA-00 and WU-FA-01  
26 displayed a high level of antimicrobial activity against Gram-positive strains.  
27 Moreover, killing kinetic studies were performed, and the results were in accordance  
28 with the MIC and MBC results. We also demonstrated that the topical application of  
29 WU-FA-00 and WU-FA-01 effectively decreased TPA-induced ear edema in a  
30 dose-dependent manner. This inhibitory effect was associated with the inhibition of  
31 TPA-induced up-regulation of pro-inflammation cytokines IL-1 $\beta$ , TNF- $\alpha$  and COX-2.  
32 WU-FA-01 significantly suppressed the expression levels of p65, I $\kappa$ B- $\alpha$ , and p-I $\kappa$ B- $\alpha$   
33 in the TPA-induced mouse ear model. Overall, our results showed that WU-FA-00 and  
34 WU-FA-01 not only had effective antimicrobial activities *in vitro*, especially to the  
35 Gram-positive bacteria, but also possessed strong anti-inflammatory effects *in vivo*.  
36 These results provide a scientific basis for developing fusidic acid derivatives as  
37 antimicrobial and anti-inflammatory agents.

38

## 39 **Introduction**

40 Over the past few decades, the appreciation of the key role of inflammation in  
41 disease diagnosis, prevention and treatment has burgeoned (1, 2). Inflammation has  
42 been defined as a complex biological response of vascular tissues to different types of  
43 harmful stimuli (3, 4), such as damaged cells, irritants or pathogens. Inflammation has  
44 also been linked to the release of pro-inflammatory cytokines (5, 6), including tumour  
45 necrosis factor-alpha (TNF- $\alpha$ ), interleukin-1 $\beta$  (IL-1 $\beta$ ), interleukin-6 (IL-6) and  
46 cyclooxygenase-2 (COX-2), all of which could be a sign of many diseases (4, 7).  
47 Therefore, inflammation is a biological response wherein the organism attempts to  
48 remove the injurious stimuli and initiate the healing process for the tissue; thus, it  
49 could be regarded as a protective effect (4).

50 Currently, steroids and non-steroidal anti-inflammatory drugs are proverbially  
51 used in clinical application as effective therapeutic anti-inflammatory agents (4).  
52 Despite the widespread use of anti-inflammatory drugs, there may be some residual  
53 risks of inflammation and the side effects of their long-term oral administration (8),  
54 especially in infectious diseases, in which patients suffer from not only the  
55 inflammatory responses but also pathogenic microorganism infections (9-11).

56 Fusidic acid (FA, WU-FA-00) (Figure 1), which has a steroid-like scaffold  
57 structurally and is derived from the fungus *Fusidium coccineum*, is the only marketed  
58 antibiotic from the fusidane family. Sodium fusidate, the sodium salt of fusidic acid,  
59 was primary introduced into practice as an anti-staphylococcal therapy in 1962  
60 (12-14). However, FA has a narrow spectrum of biological activity against some

61 anaerobic gram-negative organisms and most gram-positive bacteria, especially the  
62 staphylococci, including the methicillin-resistant *Staphylococcus aureus* (MRSA) and  
63 coagulase-negative staphylococci (15-17). Although some antimicrobial activity and  
64 reasonable anti-inflammatory effects have been discovered (18, 19), there is no  
65 in-depth study of FA and its derivatives as potential anti-inflammatory agents.  
66 Therefore, the therapeutic efficacy of FA and its derivatives as antimicrobial and  
67 anti-inflammatory agents should be explored.

68 **< Insert Fig.1 Here >**

69 In the present study, the *in vitro* antimicrobial activities of fusidic acid and its  
70 hydrogenation derivative (WU-FA-01) were investigated against six bacterial strains,  
71 including five Gram-positive bacteria strains and one Gram-negative bacteria strain.  
72 In parallel, 12-*O*-tetradecanoylphorbol-13-acetate (TPA) was used as an inducer to  
73 explore both compounds' inhibitory activity on skin inflammation in a mouse ear  
74 edema model (20-22). Moreover, immunohistochemical analysis was introduced to  
75 reveal their inhibitory effects on the expression of TPA-induced TNF- $\alpha$ , IL-1 $\beta$  and  
76 COX-2 in mouse ears. Furthermore, the anti-inflammatory mechanisms of FA and its  
77 hydrogenation derivative were also discussed to gain insight into their effects.  
78 Accordingly, fusidic acid or its derivatives, especially the hydrogenation compound,  
79 may be developed as promising di-functional parent drugs, which could be underlying  
80 anti-inflammatory and antimicrobial agents.

81

## 82 **Results**

83 **Chemistry.** To obtain the hydrogenation derivative of FA, structural modifications  
84 (according to a previous study) were made at the double bond position of C-24 and  
85 C-25 (23). The synthetic route is shown in Scheme 1. The 24, 25-dihydrofusidic acid  
86 (WU-FA-01) was prepared by Palladium catalysed hydrogenation in quantitative  
87 yielding. Its structure was confirmed by high-resolution mass spectrometry (HRMS),  
88 CHNS-O elemental analyser,  $^1\text{H}$  NMR and  $^{13}\text{C}$  NMR, and it was in accordance with  
89 the previous research (23).

90 **< Insert Scheme 1 Here >**

91 **Antibacterial activity.** The antibacterial activity of WU-FA-00 and WU-FA-01 were  
92 tested against six microorganisms, including reference strains consisting of  
93 Gram-negative bacteria and Gram-positive bacteria. All bacterial strains were cultured  
94 in Muller Hinton agar at 37 °C overnight.

95 **Agar disk diffusion method.** The results of the antimicrobial activity of WU-FA-00  
96 and WU-FA-01 against six different microorganisms are summarized in Table 1. Two  
97 different concentrations were examined in this method. The sizes of the inhibition  
98 zone indicated that the tested compounds with Gram-positive bacterial strains were  
99 larger than those with Gram-negative strains, and both compounds showed dose  
100 dependence. The inhibition zone diameter was in the range of  $10.37\pm 1.23$  to  
101  $24.22\pm 1.66$  mm for Gram-positive strains. However, both WU-FA-00 and WU-FA-01  
102 showed no inhibitory effect against the Gram-negative strains. Furthermore, the  
103 screening of the antimicrobial potential of the two compounds revealed that reducing

104 the double bond to a single bond at positions C-24 and C-25 could retain their  
105 antimicrobial activities, specifically against the Gram-positive strains.

106 **<Insert Table 1 Here>**

107 **Broth microdilution method.** A microtiter plate dilution method was conducted to  
108 determine the minimal inhibitory concentration (MIC) and the minimal bactericidal  
109 concentration (MBC) in a 96-well plate. At the end of the incubation period, the plates  
110 were evaluated for the presence or absence of bacterial growth. Each sample  
111 concentration was tested four times against each microorganism. WU-FA-00, the  
112 parent compound, was employed as a positive control against bacterial growth. The  
113 final concentration of DMSO in the 96-plate well had no effect on bacterial growth.

114 WU-FA-00 and WU-FA-01, the two tested compounds, were found to be active  
115 against the microorganisms studied, especially the Gram-positive bacteria. The MIC  
116 and MBC values of the two compounds were determined according to the results of  
117 the micro-dilution method (Table 2). The results suggested that WU-FA-01  
118 (MIC=100-625 ng/mL, MBC=200-1250 ng/mL) showed activity similar to its parent  
119 compound WU-FA-00 (MIC=100-625 ng/mL, MBC=312.5-1250 ng/mL) and  
120 indicated that the double bond at C-24 and C-25 positions in WU-FA-00 structure has  
121 little effect on its antibacterial activity. On the other hand, both WU-FA-00 and  
122 WU-FA-01 were more effective against Gram-positive strains of *Staphylococcus* than  
123 the Gram-negative strains, and this result is in accordance with the previous agar disk  
124 diffusion studies and implied that WU-FA-01 could be developed as an active  
125 antibacterial agent.

126

<Insert Table 2 Here>

127 **Killing kinetic studies.** The time killing studies were carried out over a period of 24 h;  
128 bacteria were exposed to the tested compound at four different concentrations, which  
129 were determined according to their MICs. Figure 2 displays the time-kill curves of the  
130 tested compounds for *Staphylococcus aureus* (ATCC 6538), *Staphylococcus albus*  
131 (ATCC 29213), and *Staphylococcus epidermidis* (ATCC 12228). As shown in Figure  
132 2, the MICs of the tested compounds were sufficient to inhibit almost all of the  
133 bacterial growth but with a slight increase after 20 h during this assay. Similar to the  
134 MBC results, no remarkable difference in the bacterial counts were found after  
135 incubation for 24 h at MICs, and the results confirmed that the MBCs were highly  
136 effective for killing bacteria. Furthermore, the bacterial population incubated with  
137 DMSO or with the test compounds, which were lower than that of their MICs,  
138 indicated less inhibitory action upon all selected bacterial strains. Moreover, Figure 2  
139 also indicates that there is no difference in terms of killing kinetic between the two  
140 compounds against all of the chosen Gram-positive microorganisms.

141

<Insert Fig. 2 Here>

142 **Inhibitory effects of WU-FA-00 and WU-FA-01 on TPA-induced edema in a**  
143 **mouse ear model.** A TPA-induced ear edema mouse model was utilized to evaluate  
144 the *in vivo* anti-inflammatory activities of WU-FA-00 and WU-FA-01. It has been  
145 reported that TPA, which was normally adopted in this investigation model, is a  
146 well-known promoter of skin inflammation. The average weight of the ear punches is  
147 an important indicator that reflects the degree of skin edema when compared with the

148 vehicle control group. As shown in Figure 3, the weight of mouse ear punches were  
149 significantly increased to 160.90% after 6 h when 20  $\mu$ L TPA (0.125  $\mu$ g/ $\mu$ L in acetone)  
150 was topically applied compared to the acetone-treated control group. Topical  
151 application of 2, 4 and 8  $\mu$ g/mL of WU-FA-00 after TPA treatment modestly inhibited  
152 TPA-induced ear edema by 39.04%, 73.46%, and 83.83%, respectively, compared  
153 with the TPA group. However, 2, 4 and 8  $\mu$ g/ $\mu$ L of WU-FA-01 significantly decreased  
154 the TPA-induced ear edema by 48.16%, 113.97% and 137.32%, respectively, in a  
155 dose-dependent manner. Furthermore, the compound WU-FA-01 had a similar effect  
156 on the positive control when it was used at a dose of 4  $\mu$ g/mL (7.71  $\mu$ mol/mL) with an  
157 inhibition rate of 113.97%, whereas dexamethasone had an inhibition rate of 134.13%  
158 at a dose of 2.5  $\mu$ g/mL (6.37  $\mu$ mol/mL). This result also suggested that WU-FA-01  
159 had stronger protective effects than WU-FA-00 against TPA-induced skin  
160 inflammation.

161 **<Insert Fig. 3 Here>**

162 **Inhibitory effects of WU-FA-00 and WU-FA-01 on the histological appearance of**  
163 **mouse ears.** To investigate the role of WU-FA-00 and WU-FA-01 plays in the  
164 histological appearance of a TPA-induced mouse ear model, both WU-FA-00 and  
165 WU-FA-01 were evaluated by transdermal application. In this model, the right ears of  
166 each group of mice were pretreated with 20  $\mu$ L TPA (0.125  $\mu$ g/mL in acetone), while  
167 the controls were topically adopted with acetone. The treatment compounds (20  $\mu$ L) at  
168 three different concentrations were dissolved in acetone and used 5 min later.  
169 Dexamethasone was used as a positive control at a concentration of 2.5  $\mu$ g/mL (6.37



170  $\mu\text{mol/mL}$ ) in acetone. After the ear tissues had been stained with H&E stain, as  
171 shown in Figure 4, the histological appearances of the ear sections indicated that the  
172 ears treated with acetone alone appeared normal in the epidermal layer without any  
173 obvious lesion. However, the TPA alone group displayed significant swelling, which  
174 was consistent with the results of the ear thickness and the ear punch weight (Figure  
175 3). Moreover, the topical application of WU-FA-00 and WU-FA-01 could effectively  
176 suppress signs of the inflammatory response, such as epidermal hyperplasia and dense  
177 dermal leukocyte infiltration.

178 **<Insert Fig. 4 Here>**

179 **Inhibition of TPA-induced expression of TNF- $\alpha$ , IL-1 $\beta$ , COX-2.** To gain insight  
180 into the molecular mechanisms by which WU-FA-00 and WU-FA-01 suppressed  
181 TPA-induced skin inflammation, we examined the effects of both WU-FA-00 and  
182 WU-FA-01 on the expression levels of pro-inflammation cytokines, including TNF- $\alpha$ ,  
183 IL-1 $\beta$  and COX-2, in mouse ears using immunohistochemical analysis. As shown in  
184 Figure 5, the expression level of pro-inflammation cytokines (TNF- $\alpha$ , IL-1 $\beta$  and  
185 COX-2) were dramatically elevated 6 h after topical stimulation with TPA, which was  
186 apparently down-regulated in a dose-dependent manner by treatment with WU-FA-00  
187 and WU-FA-01. However, the pro-inflammation cytokines levels of TNF- $\alpha$ , IL-1 $\beta$  and  
188 COX-2 between the treated groups and control group in the TPA-induced mouse ear  
189 model, were increased 20.37, 31.47 and 3.16-fold. Firstly, 2, 4 and 8 mg/mL of  
190 WU-FA-00 retarded TPA-induced overexpression of TNF- $\alpha$  by 5.1%, 52.9% and  
191 80.7%, while 2, 4 and 8 mg/mL of WU-FA-01 retarded TPA-induced overexpression

192 of TNF- $\alpha$  by 20.5%, 56.5% and 82.5% relative to the TPA group, respectively (Figure  
193 5A). Secondly, WU-FA-00 at 2, 4 and 8 mg/mL greatly reduced the overexpression of  
194 IL-1 $\beta$  by 36.0%, 59.8% and 86.1%, while 2, 4 and 8 mg/mL of WU-FA-01 greatly  
195 reduced the overexpression of IL-1 $\beta$  by 35.9%, 65.6% and 86.6%, respectively  
196 (Figure 5B). Thirdly, 2, 4 and 8 mg/mL of WU-FA-00 retarded TPA-induced  
197 overexpression of COX-2 by 8.3%, 26.7% and 45.8%, while 2, 4 and 8 mg/mL of  
198 WU-FA-01 retarded TPA-induced overexpression of COX-2 by 12.1%, 31.6% and  
199 56.6%, compared to the TPA group, respectively (Figure 5C). Therefore, the above  
200 results indicate that WU-FA-00 and WU-FA-01 could markedly suppressed the  
201 overexpression of pro-inflammation cytokines, which was in accordance with the  
202 previous results of ear weight and ear thickness (Figure 3) and histological changes  
203 (Figure 4) in this TPA-induced ear model.

204 **<Insert Fig. 5 Here>**

205 **Inhibition of TPA-induced expression of p65, I $\kappa$ B- $\alpha$ , and p-I $\kappa$ B- $\alpha$ .** The activation  
206 of NF- $\kappa$ B is significant for the regulation of TNF- $\alpha$ , IL-1 $\beta$  and COX-2 overexpression  
207 in the TPA-induced inflammatory model. Therefore, whether WU-FA-00 and  
208 WU-FA-01 could affect the NF- $\kappa$ B signalling pathway was determined by  
209 immunohistochemical analysis. As illustrated in Figure 6A, the results revealed that  
210 p65 was markedly suppressed by the treatment of WU-FA-00 and WU-FA-01, in  
211 which both WU-FA-00 and WU-FA-01 were more active at a concentration of 8  
212 mg/mL. Moreover, the results also confirmed that the transcriptional activity was  
213 markedly up-regulated in the TPA-induced model but was inhibited by WU-FA-00

214 and WU-FA-01 at 8 mg/mL.

215 The signalling pathway of IKK is involved in the induction of pro-inflammation  
216 cytokines *via* the modulation of NF- $\kappa$ B. Thus, it is necessary to gain insights into the  
217 I $\kappa$ B- $\alpha$ /p-I $\kappa$ B- $\alpha$  pathway in this TPA-induced model. From the immunohistochemical  
218 analysis in Figure 6B and Figure 6C, the levels of I $\kappa$ B- $\alpha$  and p-I $\kappa$ B- $\alpha$  in the TPA  
219 group were significantly increased. However, they could be suppressed by WU-FA-00  
220 and WU-FA-01 in a dose-dependent manner, especially at a higher concentration of 8  
221 mg/mL. These results imply that both WU-FA-00 and WU-FA-01 might block the  
222 activation of NF- $\kappa$ B through interfering with p65 and I $\kappa$ B- $\alpha$ /p-I $\kappa$ B- $\alpha$  to inhibit the  
223 expression of the TPA-induced pro-inflammation cytokines of TNF- $\alpha$ , IL-1 $\beta$  and  
224 COX-2.

225 <Insert Fig. 6 Here>

## 226 Discussion

227 Both WU-FA-00 and WU-FA-01 not only possessed excellent *in vitro*  
228 antimicrobial activities for Gram-positive *Staphylococcus* strains but also exhibited  
229 effective inhibition effects in the TPA-induced mouse ear model. Thus, both  
230 WU-FA-00 and WU-FA-01 could be considered as inhibitors of inflammation  
231 induced by bacterial infection. Moreover, it is possible that inflammation is frequently  
232 triggered by bacterial infection. The inhibitory effect of WU-FA-01 against  
233 microorganisms and TPA-induced skin inflammation is similar to its parent  
234 compound. The inhibitory effect of both compounds was associated with the  
235 suppression of TPA-stimulated pro-inflammation cytokines of TNF- $\alpha$ , IL-1 $\beta$  and

236 COX-2. This study provides a further understanding of the anti-inflammatory  
237 properties of WU-FA-00 and WU-FA-01. Therefore, the results of this study implied  
238 that fusidic acid and the dihydro- analogue could be developed as di-functional agents,  
239 which possess both antimicrobial and anti-inflammatory activities.

## 240 **Methods and materials**

241 **Chemicals.** Fusidic acid (FA) was purchased from Macklin Co., Ltd., with over 98%  
242 purity. 12-*O*-tetradecanoylphorbol-13-acetate (TPA) was ordered from Sigma-Aldrich  
243 Chemical Co. (Saint Louis MO). TPA, FA and its derivative were dissolved in  
244 acetone to produce the desired concentrations of each compound. TNF- $\alpha$  and IL-1 $\beta$   
245 antibodies were purchased from Bioss biotechnology Co. (Beijing, China) and  
246 Beyotime Biotechnology Co. (Beijing China). The silica gel (200-300 mesh) used in  
247 the column chromatography was supplied by Inno-chem Co., Ltd. (Beijing China).  
248 All other reagents and solvents were purchased from Adamas Reagent Ltd. (Shanghai  
249 China) or other commercial suppliers in their analytically or chemically pure forms  
250 and used without purification. TLC was performed on pre-coated silica gel F<sub>254</sub> plates  
251 (0.25 mm; E. Merck); the starting material and the product were detected by either  
252 viewing under UV light or treating with an ethanolic solution of *p*-anisaldehyde spray  
253 followed by heating. The antimicrobial activity was determined by using a  
254 Multi-model Plate Reader (Infinite 200).

255 **Preparation of WU-FA-01.** A 100-mL glassware was flamed-dried and allowed to  
256 cool in a desiccator before use. FA (1.0 g, 1.94 mmol) was dissolved in 50 mL of  
257 ethanol. 5% palladium on calcium carbonate (0.1 g, 0.19 mmol) was added to the

258 reaction. Moreover, the reaction mixture was subjected to a vacuum-nitrogen purge  
259 and left to stir under a hydrogen atmosphere for 3 h. TLC was eluted in the mixture of  
260 Ethyl acetate: Petroleum ether=1:2 (V:V) and stained in *p*-anisaldehyde.  $R_f$  values of  
261 the starting material were 0.14, and the product was 0.17. Then, the reaction mixture  
262 was filtered through a pad of Celite and washed with ethyl acetate. The solvent was  
263 removed under vacuum to obtain a white solid. Yield: >98%.

264 **Microorganisms and culture conditions.** Six bacterial strains were used for the  
265 bioassays, including three Gram-positive species, *Staphylococcus aureus* (ATCC  
266 6538), *Staphylococcus albus* (ATCC 29213), *Staphylococcus epidermidis* (ATCC  
267 12228), *Listeria monocytogenes* (ATCC 19115), and *Streptococcus pneumoniae*  
268 (ATCC 49619), and one Gram-negative species, *Escherichia coli* (CMCC 44102). All  
269 bacteria were maintained on Mueller-Hinton agar, and the cultures were stored at 4 °C  
270 and sub-cultured every week.

271 **Agar disk diffusion method.** The antimicrobial activity of WU-FA-00 and  
272 WU-FA-01 were determined according to the standard agar disk diffusion method  
273 with a slight modification (24-26). A 0.5 McFarland ( $1 \times 10^7$  to  $1 \times 10^8$  CFU/mL)  
274 concentration of the bacterial suspension was uniformly inoculated onto Mueller  
275 Hinton agar (MHA) solidified in 120 mm Petri dishes. Once the dishes were prepared,  
276 6 mm-diameter discs of filter paper containing 5  $\mu$ L of the examined compound,  
277 which had been diluted ten times with dimethyl sulfoxide (DMSO), were pressed  
278 gently against the surface of the agar. Discs containing WU-FA-00 were used as the  
279 positive control, while DMSO was used as the negative control. The dishes were

280 incubated in a constant temperature incubator at 37 °C for 24 h. The inhibition zone  
281 (IZ) diameter was measured by a vernier caliper. All of the experiments were  
282 performed in triplicate.

283 **Broth microdilution method.** The minimum inhibitory concentration (MIC) and the  
284 minimum bactericidal concentration (MBC) were determined by a microdilution  
285 method in 96-microwell plates according to Clinical and Laboratory Standards  
286 Institute (CLSI), with a slight modification (27, 28). A dilution series of the test  
287 compounds were obtained with DMSO as the solvent by two-fold serial dilution. The  
288 final concentrations of the test compound were 1~400 µg/mL. Each well received 5  
289 µL of a specific concentration of the compound and 195 µL of Mueller Hinton broth  
290 inoculated with the test microorganism ( $1.5 \times 10^5$  CFU/mL); the final concentration of  
291 the test compound reached 0.025~10 µg/mL. WU-FA-00 and DMSO were treated as a  
292 positive control and a negative control, respectively. The microplates were incubated  
293 in a bacteriological oven for 24 h at 37 °C, and the drug susceptibility results were  
294 monitored by measuring the absorbance at 600 nm using a Multimodel Plate Reader  
295 (Infinite 200). The lowest concentration without visible growth was defined as the  
296 MIC.

297 The minimum bactericidal concentrations (MBCs) were determined based on the  
298 MIC results (29, 30): serial sub-cultivation of a 5 µL aliquot near the MIC in  
299 microtiter plates containing 195 µL of Mueller Hinton broth per well; incubation for  
300 24 h at 37 °C. The lowest concentration of antimicrobial agent that killed at least 99.9%  
301 of the starting inoculum was defined as the MBC endpoint, which was determined as

302 the lowest concentration with no visible growth by measuring the absorbance at 600  
303 nm using a Multimodel Plate Reader (Infinite 200). All experiments were conducted  
304 in triplicate.

305 **Killing kinetic studies.** The killing kinetic assay on the Gram-positive strains (27, 31,  
306 32), including *Staphylococcus aureus* (ATCC 6538), *Staphylococcus albus* (ATCC  
307 29213), and *Staphylococcus epidermidis* (ATCC 12228), was performed against  
308 WU-FA-00 and WU-FA-01 in 96-microwell plates, respectively, and four different  
309 concentrations (0, 25, 100, 312.5 ng/mL) of each compound were tested. The  
310 microplates were incubated for 24 h at 37 °C, and the growth of bacteria was  
311 monitored by measuring the absorbance at 600 nm using a Multimodel Plate Reader  
312 (Infinite 200) every 1 h.

313 **Animals, diets and treatments.** Female Kunming mice approximately 22-25 g were  
314 used in the TPA-induced *in vivo* model. All animals were supplied by the  
315 Experimental Animal Centre of Guangdong Province. They were maintained at 25±1 °C  
316 with standard mouse chow diet and tap water *ad libitum* and were kept on a regular  
317 light-dark cycle with 50% relative humidity. All the animal experiments were  
318 performed according to the Ethical Regulations on Animal Research of Southern  
319 Medical University (Approval Documents: SCXK/20130002).

320 **TPA-induced skin inflammation in mouse.** The mice were divided into nine groups:  
321 each group consisted of six mice, including a blank group, a TPA group, a  
322 dexamethasone group, and six groups for WU-FA-00 and WU-FA-01. In the mouse  
323 ear edema model, 20 µL of acetone vehicle was topically applied to the right ear, and

324 20  $\mu$ L of the treatment compounds at three different concentrations, which were  
325 dissolved in acetone, were used 5 min later after 20  $\mu$ L of TPA (0.125  $\mu$ g/mL in  
326 acetone) was previously applied to induce the inflammation model (33, 34).  
327 Dexamethasone at a concentration of 2.5  $\mu$ g/mL (6.37  $\mu$ mol/mL) in acetone was used  
328 as the positive control. Then, all of the mice were maintained at a standard condition  
329 and sacrificed 6 h after TPA treatment. Two ear punches (9 mm in diameter) from the  
330 right and left ears were then harvested immediately and weighted; the left ear was  
331 used for comparison. All experiments were carried out in compliance with the  
332 relevant laws and institutional guidelines, which were all approved by the Southern  
333 Medical University (Approval Documents: SCXK/20130002).

334 **Histological appearance of mouse ears.** The right ear punches were fixed in 10%  
335 neutral buffered formalin, decalcified in EDTA buffer, subjected to a series  
336 progression of dehydration and embedded in paraffin. Sections of 9 mm were cut by  
337 using a microtome and were mounted on colourfrost microslides (VWR scientific,  
338 Edmonton, Alberta, Canada). The sections were dried overnight and stained with  
339 haematoxylin and eosin (H&E) in accordance with the classical methods of histology.  
340 Images of the sections representing each treatment group were observed under a  
341 microscope (Olympus, Japan) to evaluate the damage of ear tissue.

342 **Scoring the expression of biomarkers.** Each histologic type of lesion in the  
343 TPA-induced ear model was scored independently by two experienced investigators  
344 who were not aware of the identity of the specimens ( $\times 200$ ) (33, 35). The staining  
345 intensity was scored as follows: 0, no staining; 1+, faint; 2+, moderate; and 3+, strong.



346 1+, 2+ and 3+ were recorded as 1, 2 and 3 points, respectively. The staining extent  
347 was graded as follows: 0, no staining; 1+,  $\leq 25\%$  of cell positive; 2+, 26% to 50% of  
348 cells positive; and 3+,  $\geq 51\%$  of cells positive.

349 **Immunohistochemical detection of TNF- $\alpha$ , IL-1 $\beta$ , COX-2, p65, I $\kappa$ B- $\alpha$ , and**

350 **p-I $\kappa$ B- $\alpha$  expression.** The ear punch tissues were fixed in formalin, and paraffinised

351 sections of 5  $\mu$ m thickness were incubated with 1.2% H<sub>2</sub>O<sub>2</sub> in PBS to quench the

352 endogenous peroxidase activity in order to minimize nonspecific staining. Then, the

353 sections were washed three times (5 min each) with 1X TBST (0.05% Tween-20).

354 Subsequently, the primary antibody of a proliferating cell nuclear antigen was diluted

355 100 times, applied to each section and left overnight at 4 °C. The sections were

356 washed with PBS and incubated with a biotin-conjugated horseradish peroxidase

357 antibody (1:200) for 1 h at room temperature. Finally, peroxidase was detected using

358 the 3, 3-diaminobenzidine tetrahydrochloride reaction, which produced a brown label

359 in the epidermal tissue. The cells that stained positive for TNF- $\alpha$ , IL-1 $\beta$  and COX-2

360 were counted in the section of the mouse ear using the Image-Pro Plus (Version 6.0)

361 software (33). The results were expressed as the number of stained cells.

362 Immunohistochemical analysis of p65, I $\kappa$ B- $\alpha$  and p-I $\kappa$ B- $\alpha$  were also conducted to

363 gain insight into the signalling pathway of WU-FA-00 and WU-FA-01 in the

364 TPA-induced mouse ear edema model.

365 **Statistical analysis.** The results are expressed as the mean  $\pm$  standard error (SE) or

366 standard deviation (SD). Statistical comparisons among groups were performed by

367 using Dunnett's multiple test. Statistical significance was defined by a *P* value of  $<$

368 0.05.

## 369 **References**

- 370 1. Lucas SM, Rothwell NJ, Gibson RM. 2006. The role of inflammation in CNS  
371 injury and disease. *British Journal of Pharmacology* 147:S232-S240.
- 372 2. Tak PP, Firestein GS. 2001. NF-kappa B: a key role in inflammatory diseases.  
373 *Journal of Clinical Investigation* 107:7-11.
- 374 3. Hansson GK. 2005. Mechanisms of disease - Inflammation, atherosclerosis,  
375 and coronary artery disease. *New England Journal of Medicine*  
376 352:1685-1695.
- 377 4. Hotamisligil GS. 2006. Inflammation and metabolic disorders. *Nature*  
378 444:860-867.
- 379 5. Hanada T, Yoshimura A. 2002. Regulation of cytokine signaling and  
380 inflammation. *Cytokine & Growth Factor Reviews* 13:413-421.
- 381 6. Hermanns HM, Wohlfahrt J, Mais C, Hergovits S, Jahn D, Geier A. 2016.  
382 Endocytosis of pro-inflammatory cytokine receptors and its relevance for  
383 signal transduction. *Biological Chemistry* 397:695-708.
- 384 7. Nagatsu T, Sawada M. 2005. Inflammatory process in Parkinson's disease:  
385 Role for cytokines. *Current Pharmaceutical Design* 11:999-1016.
- 386 8. Etminan M, Gill S, Samii A. 2003. Effect of non-steroidal anti-inflammatory  
387 drugs on risk of Alzheimer's disease: systematic review and meta-analysis of  
388 observational studies. *British Medical Journal* 327:128-+.
- 389 9. Bessone F. 2010. Non-steroidal anti-inflammatory drugs: What is the actual

- 390 risk of liver damage? *World Journal of Gastroenterology* 16:5651-5661.
- 391 10. Jeffcoach DR, Sams VG, Lawson CM, Enderson BL, Smith ST, Kline H,  
392 Barlow PB, Wylie DR, Krumenacker LA, McMillen JC, Pyda J, Daley BJ, Ctr  
393 UTM. 2014. Nonsteroidal anti- inflammatory drugs' impact on nonunion and  
394 infection rates in long- bone fractures. *Journal of Trauma and Acute Care*  
395 *Surgery* 76:779-783.
- 396 11. Joyau C, Van Wessem-Jouanneaux C, Asseray N, Veyrac G, Jolliet P. 2014.  
397 Non steroidal anti-inflammatory drugs (NSAIDs) and serious infectious risk.  
398 *Fundamental & Clinical Pharmacology* 28:103-103.
- 399 12. Barber M, Waterworth P. 1962. Antibacterial activity in vitro of fucidin. *The*  
400 *Lancet* 279:931-932.
- 401 13. Godtfredsen W, Jahnsen S, Lorck H, Roholt K, Tybring L. 1962. Fusidic acid:  
402 a new antibiotic. *Nature* 193.
- 403 14. Godtfredsen W, Roholt K, Tybring L. 1962. Fucidin: a new orally active  
404 antibiotic. *The Lancet* 279:928-931.
- 405 15. Collignon P, Turnidge J. 1999. Fusidic acid in vitro activity. *International*  
406 *Journal of Antimicrobial Agents* 12:S45-S58.
- 407 16. O'Neill AJ, Bostock JM, Moita AM, Chopra I. 2002. Antimicrobial activity  
408 and mechanisms of resistance to cephalosporin P1, an antibiotic related to  
409 fusidic acid. *Journal of Antimicrobial Chemotherapy* 50:839-848.
- 410 17. Verbist L. 1990. The antimicrobial activity of fusidic acid. *Journal of*  
411 *Antimicrobial Chemotherapy* 25:1-5.

- 412 18. Bendtzen K, Vesti-Nielsen N, Petersen Jr, Andersen V, Bendixen G. 1991.  
413 Treatment of chronic endogenous uveitis with fusidic acid. *The Lancet*  
414 337:552-553.
- 415 19. Mohamed MF, Seleem MN. 2014. Efficacy of short novel antimicrobial and  
416 anti-inflammatory peptides in a mouse model of methicillin-resistant  
417 *Staphylococcus aureus* (MRSA) skin infection. *Drug Design Development and*  
418 *Therapy* 8:1979-1983.
- 419 20. Kuo DH, Lai YS, Lo CY, Cheng AC, Wu H, Pan MH. 2010. Inhibitory Effect  
420 of Magnolol on TPA-Induced Skin Inflammation and Tumor Promotion in  
421 Mice. *Journal of Agricultural and Food Chemistry* 58:5777-5783.
- 422 21. Murakawa M, Yamaoka K, Tanaka Y, Fukuda Y. 2006. Involvement of tumor  
423 necrosis factor (TNF)-alpha in phorbol ester  
424 12-O-tetradecanoylphorbol-13-acetate (TPA)-induced skin edema in mice.  
425 *Biochemical Pharmacology* 71:1331-1336.
- 426 22. Stanley P, Steiner S, Havens M, Tramposch K. 1991. Mouse skin  
427 inflammation induced by multiple topical applications of  
428 12-O-tetradecanoylphorbol-13-acetate. *Skin Pharmacology and Physiology*  
429 4:262-271.
- 430 23. Godtfredsen W, Von Daehne W, Tybring L, Vangedal S. 1966. Fusidic acid  
431 derivatives. I. Relationship between structure and antibacterial activity.  
432 *Journal of medicinal chemistry* 9:15-22.
- 433 24. Benamrouche N, Lazri M, Tali-Maamar H, Rahal K. 2014. [Comparison of

- 434 Corynebacterium diphtheriae susceptibility testing to antibiotics by the broth  
435 dilution and diffusion (E-test and disk) methods]. *Medecine et maladies*  
436 *infectieuses* 44:392-393.
- 437 25. Gaudreau C, Girouard Y, Gilbert H, Gagnon J, Bekal S. 2008. Comparison of  
438 Disk Diffusion and Agar Dilution Methods for Erythromycin, Ciprofloxacin,  
439 and Tetracycline Susceptibility Testing of *Campylobacter coli* and for  
440 Tetracycline Susceptibility Testing of *Campylobacter jejuni* subsp *jejuni*.  
441 *Antimicrobial Agents and Chemotherapy* 52:4475-4477.
- 442 26. Luangtongkum T, Morishita TY, El-Tayeb AB, Ison AJ, Zhang QJ. 2007.  
443 Comparison of antimicrobial susceptibility testing of *Campylobacter* spp. by  
444 the agar dilution and the agar disk diffusion methods. *Journal of Clinical*  
445 *Microbiology* 45:590-594.
- 446 27. Meng YS, Hou XC, Lei JX, Chen MM, Cong SC, Zhang YY, Ding WM, Li  
447 GL, Li XR. 2016. Multi-functional Liposomes Enhancing Target and  
448 Antibacterial Immunity for Antimicrobial and Anti-Biofilm Against  
449 Methicillin-Resistant *Staphylococcus aureus*. *Pharmaceutical Research*  
450 33:763-775.
- 451 28. Sader HS, Fritsche TR, Jones RN. 2006. Daptomycin bactericidal activity and  
452 correlation between disk and broth microdilution method results in testing of  
453 *Staphylococcus aureus* strains with decreased susceptibility to vancomycin.  
454 *Antimicrobial Agents and Chemotherapy* 50:2330-2336.
- 455 29. Chouaib K, Hichri F, Nguir A, Daami-Remadi M, Elie N, Touboul D, Ben

- 456 Jannet H, Hamza MA. 2015. Semi-synthesis of new antimicrobial esters from  
457 the natural oleanolic and maslinic acids. *Food Chemistry* 183:8-17.
- 458 30. Jabrane A, Ben Jannet H, Mastouri M, Mighri Z, Casanova J. 2010. Chemical  
459 composition and in vitro evaluation of antioxidant and antibacterial activities  
460 of the root oil of *Ridolfia segetum* (L.) Moris from Tunisia. *Natural Product*  
461 *Research* 24:491-499.
- 462 31. Phee LM, Betts JW, Bharathan B, Wareham DW. 2015. Colistin and Fusidic  
463 Acid, a Novel Potent Synergistic Combination for Treatment of  
464 Multidrug-Resistant *Acinetobacter baumannii* Infections. *Antimicrobial*  
465 *Agents and Chemotherapy* 59:4544-4550.
- 466 32. Theophel K, Schacht VJ, Schluter M, Schnell S, Stingu CS, Schaumann R,  
467 Bunge M. 2014. The importance of growth kinetic analysis in determining  
468 bacterial susceptibility against antibiotics and silver nanoparticles. *Frontiers in*  
469 *Microbiology* 5.
- 470 33. Liu WF, Li YL, Zheng X, Zhang K, Du ZY. 2015. Potent inhibitory effect of  
471 silibinin from milk thistle on skin inflammation stimuli by  
472 12-O-tetradecanoylphorbol-13-acetate. *Food & Function* 6:3712-3719.
- 473 34. Wu X, Song MY, Rakariyatham K, Zheng JK, Wang MQ, Xu F, Gao ZL, Xiao  
474 H. 2015. Inhibitory Effects of 4'-Demethylnobiletin, a Metabolite of Nobiletin,  
475 on 12-O-Tetradecanoylphorbol-13-acetate (TPA)-Induced Inflammation in  
476 Mouse Ears. *Journal of Agricultural and Food Chemistry* 63:10921-10927.
- 477 35. Ouyang N, Williams JL, Tsioulis GJ, Gao JJ, Iatropoulos MJ, Kopelovich L,

478 Kashfi K, Rigas B. 2006. Nitric oxide-donating aspirin prevents pancreatic  
479 cancer in a hamster tumor model. *Cancer Research* 66:4503-4511.

## 480 **Funding**

481 This study was supported by the joint research project of Liverpool-Guangdong Drug  
482 Discovery Initiative (Grant No. 607140051), the foundation of High-level Personnel  
483 Research Activation (Grant No. 2017RC04) and Youth innovation talents program of  
484 Guangdong Province (Grant No. 2017KQNCX200). The authors are also grateful to  
485 the foundation of Department of Education of Guangdong Province (Grant No.  
486 2016KCXTD005), the Youth Foundation of Wuyi University (Grant No. 2017td01)  
487 and the Doctor Research Activation Funding of Wuyi University (Grant No.  
488 5011701521).

## 489 **Author Contributions**

490 Performing the experimental work and drafting the manuscript: (PPW, XPC).  
491 Performing the bioactivity test: (PPW, HH, TRW, BRT, YYZ). Performing the  
492 experimental statistical analysis (PPW, XPC, MG, DLL, JZ, ZJS). The director as well  
493 as the designer of the manuscript: (WDH, XTX, KZ). The project coordinator: (WDH,  
494 SAW, PMO, SQZ).

## 495 **Competing of interests**

496 The authors declare no competing financial interests.

## 497 **Acknowledgments**

498 Sincere and heartfelt thanks must go to Miss Sulian Liang who has given generous  
499 suggestions on the English language of the manuscript.

500 **Table 1 Antibacterial activity of WU-FA-00 and WU-FA-01 expressed in the**  
 501 **inhibition zone (mm).**

| Compound                                          | WU-FA-00                                                                          |                  | WU-FA-01                                                                            |                  |
|---------------------------------------------------|-----------------------------------------------------------------------------------|------------------|-------------------------------------------------------------------------------------|------------------|
| Structure                                         | 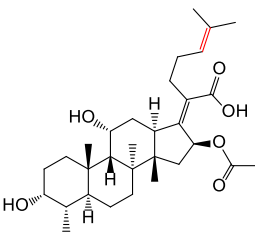 |                  |  |                  |
| Concentration ( $\mu\text{g/mL}$ )                | 25                                                                                | 12.5             | 25                                                                                  | 12.5             |
| Dosage (ng)                                       | 125                                                                               | 62.5             | 125                                                                                 | 62.5             |
| Bacterium                                         | Inhibition Zone (mm)                                                              |                  |                                                                                     |                  |
| <i>Staphylococcus aureus</i><br>(ATCC 6538)       | 23.09 $\pm$ 0.37                                                                  | 20.60 $\pm$ 0.40 | 23.08 $\pm$ 1.13                                                                    | 20.05 $\pm$ 0.30 |
| <i>Staphylococcus albus</i><br>(ATCC 29213)       | 21.48 $\pm$ 0.36                                                                  | 18.75 $\pm$ 0.44 | 19.93 $\pm$ 1.03                                                                    | 17.10 $\pm$ 0.14 |
| <i>Staphylococcus epidermidis</i><br>(ATCC 12228) | 24.22 $\pm$ 1.66                                                                  | 20.04 $\pm$ 0.35 | 22.91 $\pm$ 0.84                                                                    | 17.42 $\pm$ 0.40 |
| <i>Listeria monocytogenes</i><br>(ATCC 19115)     | 11.63 $\pm$ 1.33                                                                  | 10.44 $\pm$ 0.82 | 11.49 $\pm$ 0.41                                                                    | 10.55 $\pm$ 1.20 |
| <i>Streptococcus pneumoniae</i><br>(ATCC 49619)   | 8.22 $\pm$ 0.79                                                                   | 7.37 $\pm$ 1.23  | 9.39 $\pm$ 0.90                                                                     | 7.52 $\pm$ 1.11  |
| <i>Escherichia coli</i><br>(CMCC 44102)           | ND                                                                                | ND               | ND                                                                                  | ND               |



502 ND, not determined.

503 **Table 2 Antibacterial activities of WU-FA-00 and WU-FA-01 expressed in MIC**  
504 **and MBC (ng/mL).**

| Bacteria                  |                                                | Compounds |       |          |       |
|---------------------------|------------------------------------------------|-----------|-------|----------|-------|
|                           |                                                | WU-FA-00  |       | WU-FA-01 |       |
|                           |                                                | MIC       | MBC   | MIC      | MBC   |
|                           |                                                | ng/mL     |       | ng/mL    |       |
| Gram-positive<br>bacteria | <i>Staphylococcus aureus</i> (ATCC 6538)       | 100       | 312.5 | 100      | 200   |
|                           | <i>Staphylococcus albus</i> (ATCC 29213)       | 625       | 1250  | 625      | 1250  |
|                           | <i>Staphylococcus epidermidis</i> (ATCC 12228) | 625       | 1250  | 625      | 1250  |
|                           | <i>Listeria monocytogenes</i> (ATCC 19115)     | > 1250    | >1250 | >1250    | >1250 |
|                           | <i>Streptococcus pneumoniae</i> (ATCC 49619)   | > 1250    | >1250 | >1250    | >1250 |
| Gram-negative<br>bacteria | <i>Escherichia coli</i> (CMCC 44102)           | ND        | ND    | ND       | ND    |

505 MIC (ng/mL), minimum inhibitory concentration, i.e., the lowest concentration of the compound

506 that completely inhibits the growth of bacteria.

507 MBC (ng/mL), minimum bacterial concentration, i.e., the lowest concentration of the compound

508 that completely kills the bacteria.

509 ND, not determined.

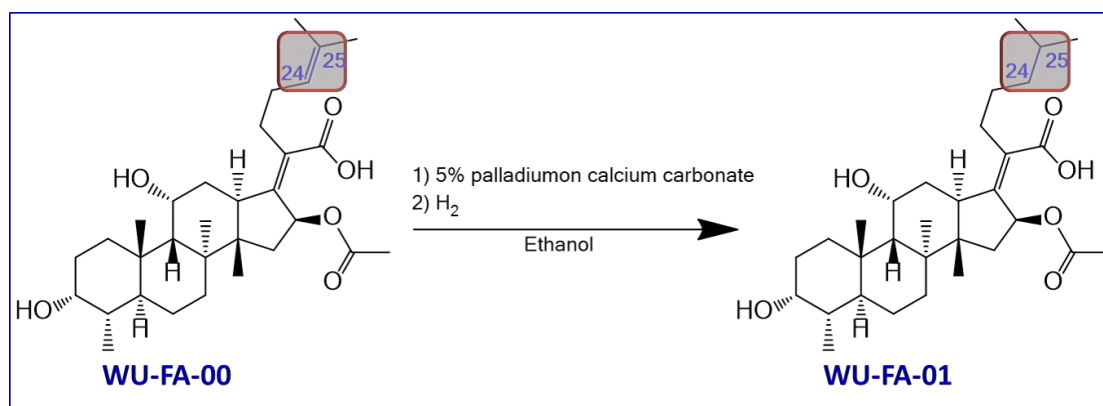

511 **Scheme 1 Synthesis of the hydrogenation derivative of fusidic acid (WU-FA-01).**

## 512 **Figure legends**

513 **Fig. 1 Chemical structure and conformation of fusidic acid (WU-FA-00).**

514 **Fig. 2 Time-kill curves for the three Gram-positive strains.** Including  
515 *Staphylococcus aureus* (ATCC 6538) (A and D), *Staphylococcus epidermidis* (ATCC  
516 12228) (B and E), and *Staphylococcus albus* (ATCC 29213) (C and F), exposed to  
517 four different concentrations of WU-FA-00 (Figure 2A, 2B, 2C) and WU-FA-01  
518 (Figure 2D, 2E, 2F) according to their respective MICs (n=4).

519 **Fig. 3 Inhibition effects of WU-FA-00 and WU-FA-01 on TPA-induced edema in**  
520 **mouse ears.** The right ears of all animals (n=6) were topically treated with 20  $\mu$ L of  
521 acetone (vehicle control) or WU-FA-00/WU-FA-01 (2, 4 or 8  $\mu$ g/ $\mu$ L) in 20  $\mu$ L of  
522 acetone after the application of TPA (2  $\mu$ g/ $\mu$ L) in 20  $\mu$ L of acetone. The mice were  
523 sacrificed 6 h after the TPA treatment. Both ear punches (9 mm in diameter) were  
524 immediately taken, and then, they were weighted and measured. The data from each  
525 group are expressed as the mean  $\pm$  S.D. Compared to the TPA induced model group  
526 (n=6), \* $P$ <0.05, \*\* $P$ <0.01 (Dunnett's multiple comparison test).

527 **Fig. 4 H&E staining for histological changes of TPA-induced mouse ears treated**  
528 **with an acetone control, TPA, WU-FA-00 and WU-FA-01 at different**  
529 **concentrations.** The data from each group are expressed as the mean  $\pm$  S.D.  
530 Compared to the TPA-induced model group (n=6), \* $P$ <0.05, \*\* $P$ <0.01 (Dunnett's  
531 multiple comparison test). Magnification 200 $\times$ .

532 **Fig. 5 Effects of WU-FA-00 and WU-FA-01 treatment on pro-inflammation**

533 **cytokines levels of TNF- $\alpha$  (Figure 5A), IL-1 $\beta$  (Figure 5B) and COX-2 (Figure 5C)**  
534 **in a mouse ear model.** Mouse ears treated with acetone, TPA, WU-FA-00 and  
535 WU-FA-01 at different concentrations were analysed by immunohistochemical  
536 staining. The data are shown as the mean  $\pm$  SD. Compared to the TPA-induced model  
537 group (n=6), \* $P < 0.05$ , \*\* $P < 0.01$  (Dunnett's multiple comparison test).  
538 Magnification 200 $\times$ .

539 **Fig. 6 Inhibitory effects of WU-FA-00 and WU-FA-01 on the phosphorylation of**  
540 **p65 (Figure 6A), I $\kappa$ B- $\alpha$  (Figure 6B) and p-I $\kappa$ B- $\alpha$  (Figure 6C) in the TPA-induced**  
541 **ear model.** Mouse ears treated with acetone, TPA, WU-FA-00 and WU-FA-01 at  
542 different concentrations were analysed by immunohistochemical staining. The data  
543 are shown as the mean  $\pm$  SD. Compared to the TPA-induced model group (n=6), \* $P <$   
544  $0.05$ , \*\* $P < 0.01$  (Dunnett's multiple comparison test). Magnification 200 $\times$ .  
545

546 **Figures**

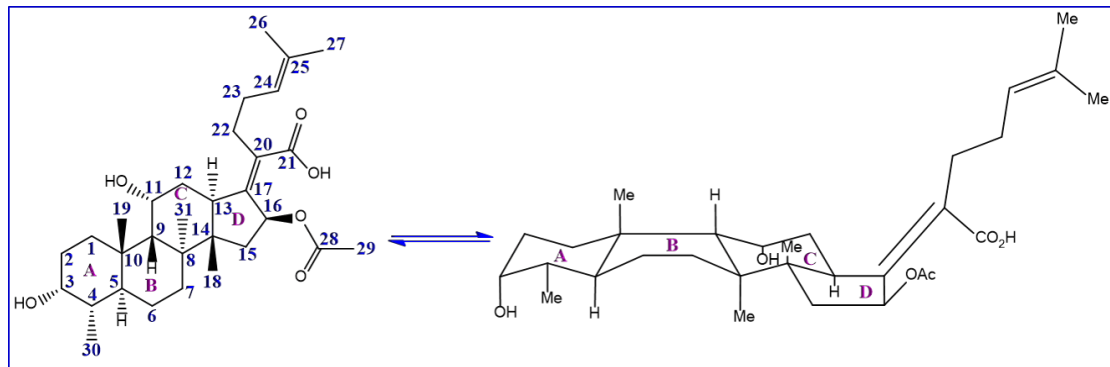

548 **Fig. 1 Chemical structure and conformation of fusidic acid (WU-FA-00).**

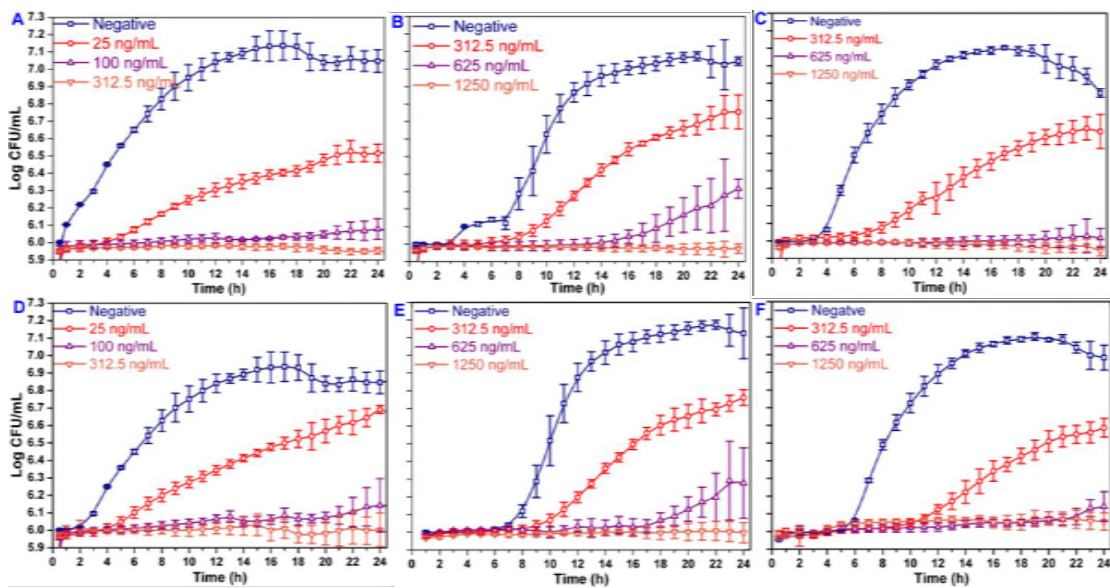

550 **Fig. 2 Time-kill curves for the three Gram-positive strains.** Including  
551 *Staphylococcus aureus* (ATCC 6538) (A and D), *Staphylococcus epidermidis* (ATCC  
552 12228) (B and E), and *Staphylococcus albus* (ATCC 29213) (C and F), exposed to  
553 four different concentrations of WU-FA-00 (Figure 2A, 2B, 2C) and WU-FA-01  
554 (Figure 2D, 2E, 2F) according to their respective MICs (n=4).

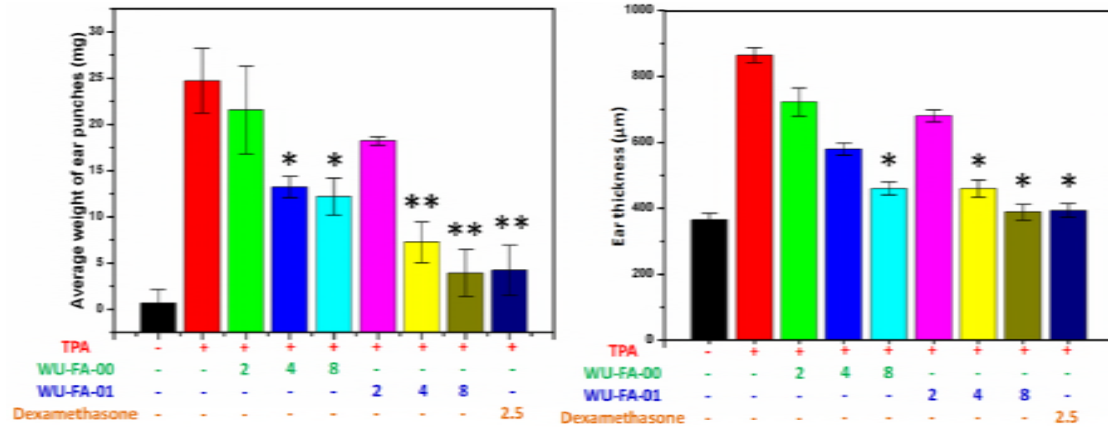

555

556 **Fig. 3 Inhibition effects of WU-FA-00 and WU-FA-01 on TPA-induced edema in**

557 **mouse ears.** The right ears of all animals (n=6) were topically treated with 20 µL of

558 acetone (vehicle control) or WU-FA-00/WU-FA-01 (2, 4 or 8 µg/µL) in 20 µL of

559 acetone after the application of TPA (2 µg/µL) in 20 µL of acetone. The mice were

560 sacrificed 6 h after the TPA treatment. Both ear punches (9 mm in diameter) were

561 immediately taken, and then, they were weighted and measured. The data from each

562 group are expressed as the mean ± S.D. Compared to the TPA induced model group

563 (n=6), \*  $P < 0.05$ , \*\*  $P < 0.01$  (Dunnett's multiple comparison test).

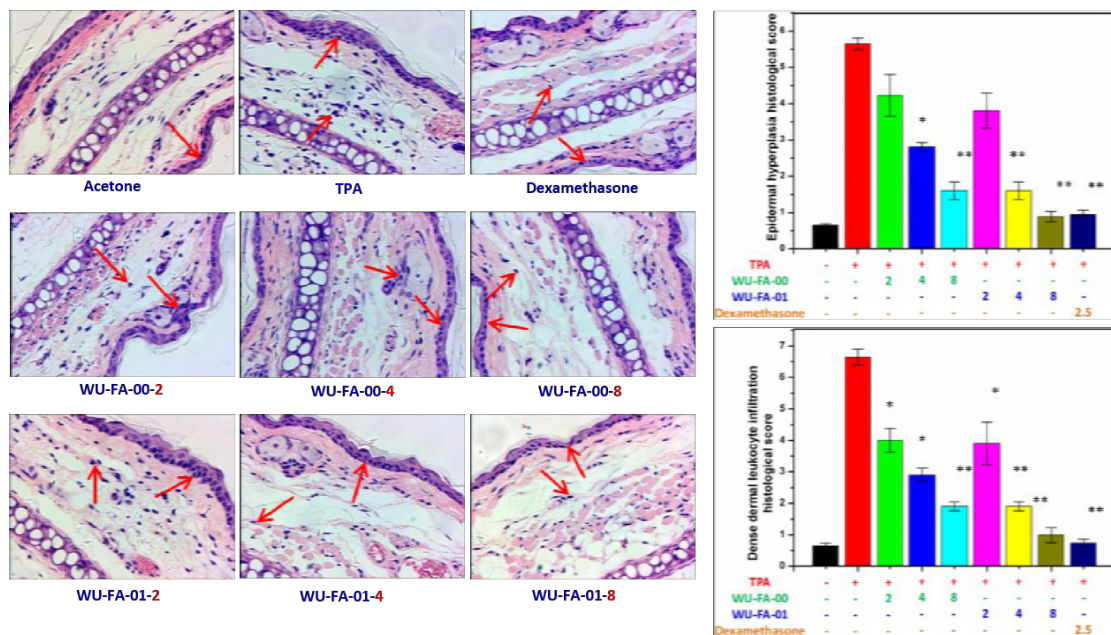

564

565 **Fig. 4 H&E staining for histological changes of TPA-induced mouse ears treated**

566 **with an acetone control, TPA, WU-FA-00 and WU-FA-01 at different**  
567 **concentrations.** The data from each group are expressed as the mean  $\pm$  S.D.  
568 Compared to the TPA-induced model group (n=6), \* $P < 0.05$ , \*\* $P < 0.01$  (Dunnett's  
569 multiple comparison test). Magnification 200 $\times$ .

Figure 5A

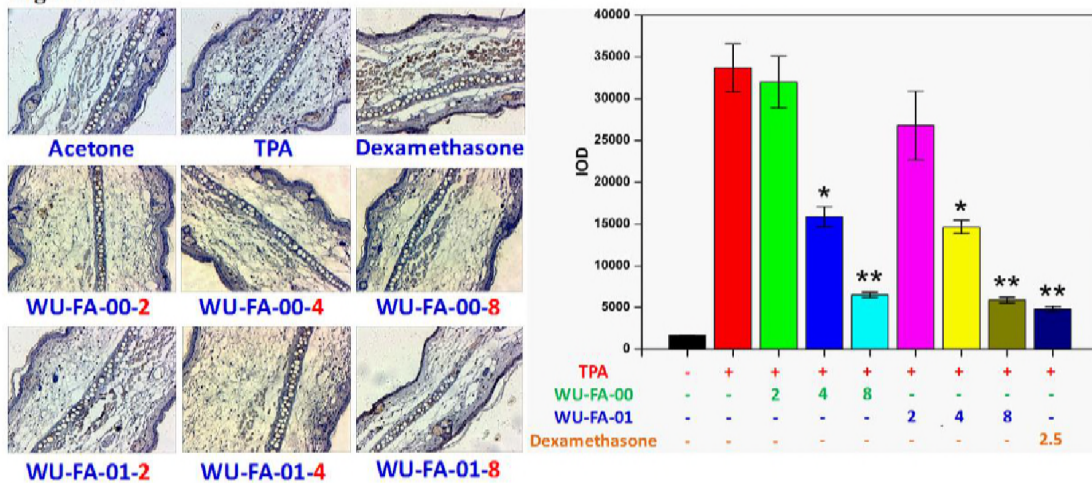

Figure 5B

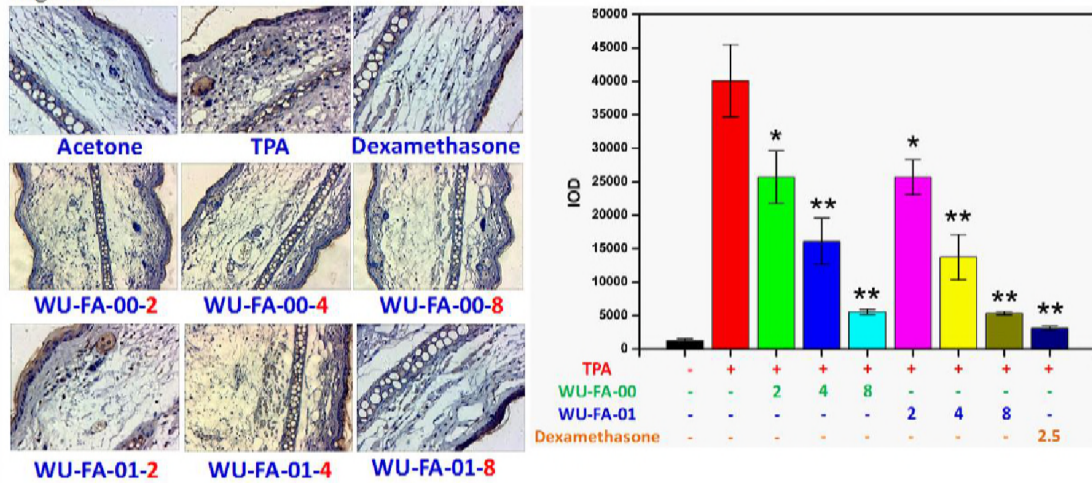

Figure 5C

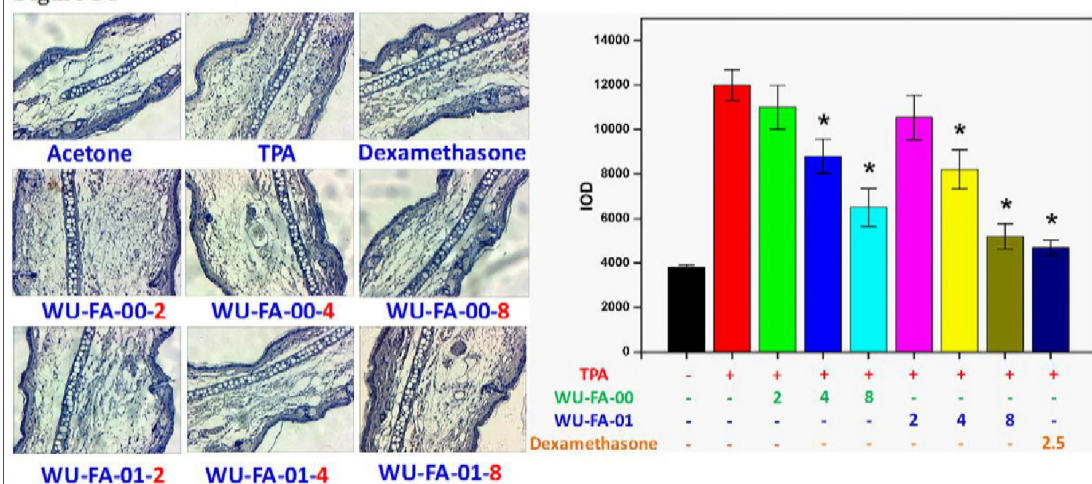

570

571 **Fig. 5 Effects of WU-FA-00 and WU-FA-01 treatment on pro-inflammation**

572 **cytokines levels of TNF- $\alpha$  (Figure 5A), IL-1 $\beta$  (Figure 5B) and COX-2 (Figure 5C)**

573 **in a mouse ear model.** Mouse ears treated with acetone, TPA, WU-FA-00 and

574 WU-FA-01 at different concentrations were analysed by immunohistochemical  
 575 staining. The data are shown as the mean  $\pm$  SD. Compared to the TPA-induced model  
 576 group (n=6), \* $P < 0.05$ , \*\* $P < 0.01$  (Dunnett's multiple comparison test).  
 577 Magnification 200 $\times$ .

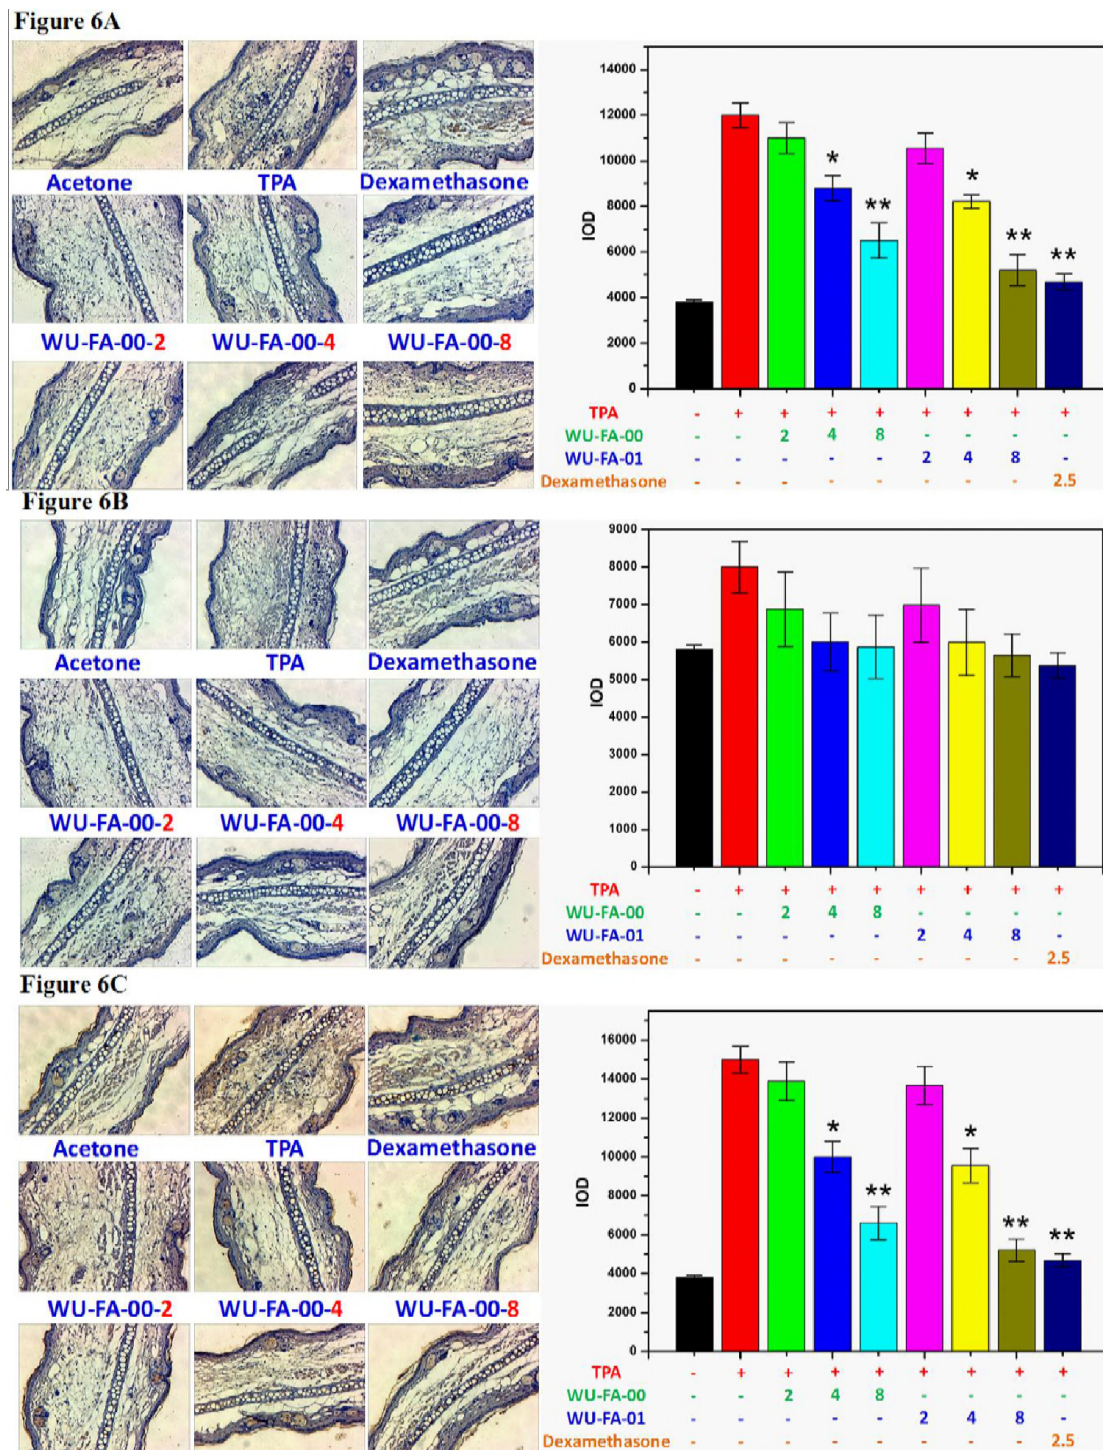

578

579 **Fig. 6** Inhibitory effects of WU-FA-00 and WU-FA-01 on the phosphorylation of



580 **p65 (Figure 6A), I $\kappa$ B- $\alpha$  (Figure 6B) and p-I $\kappa$ B- $\alpha$  (Figure 6C) in the TPA-induced**  
581 **ear model.** Mouse ears treated with acetone, TPA, WU-FA-00 and WU-FA-01 at  
582 different concentrations were analysed by immunohistochemical staining. The data  
583 are shown as the mean  $\pm$ SD. Compared to the TPA-induced model group (n=6), \* $P$ <  
584 0.05, \*\* $P$ <0.01 (Dunnett's multiple comparison test). Magnification 200 $\times$ .

585

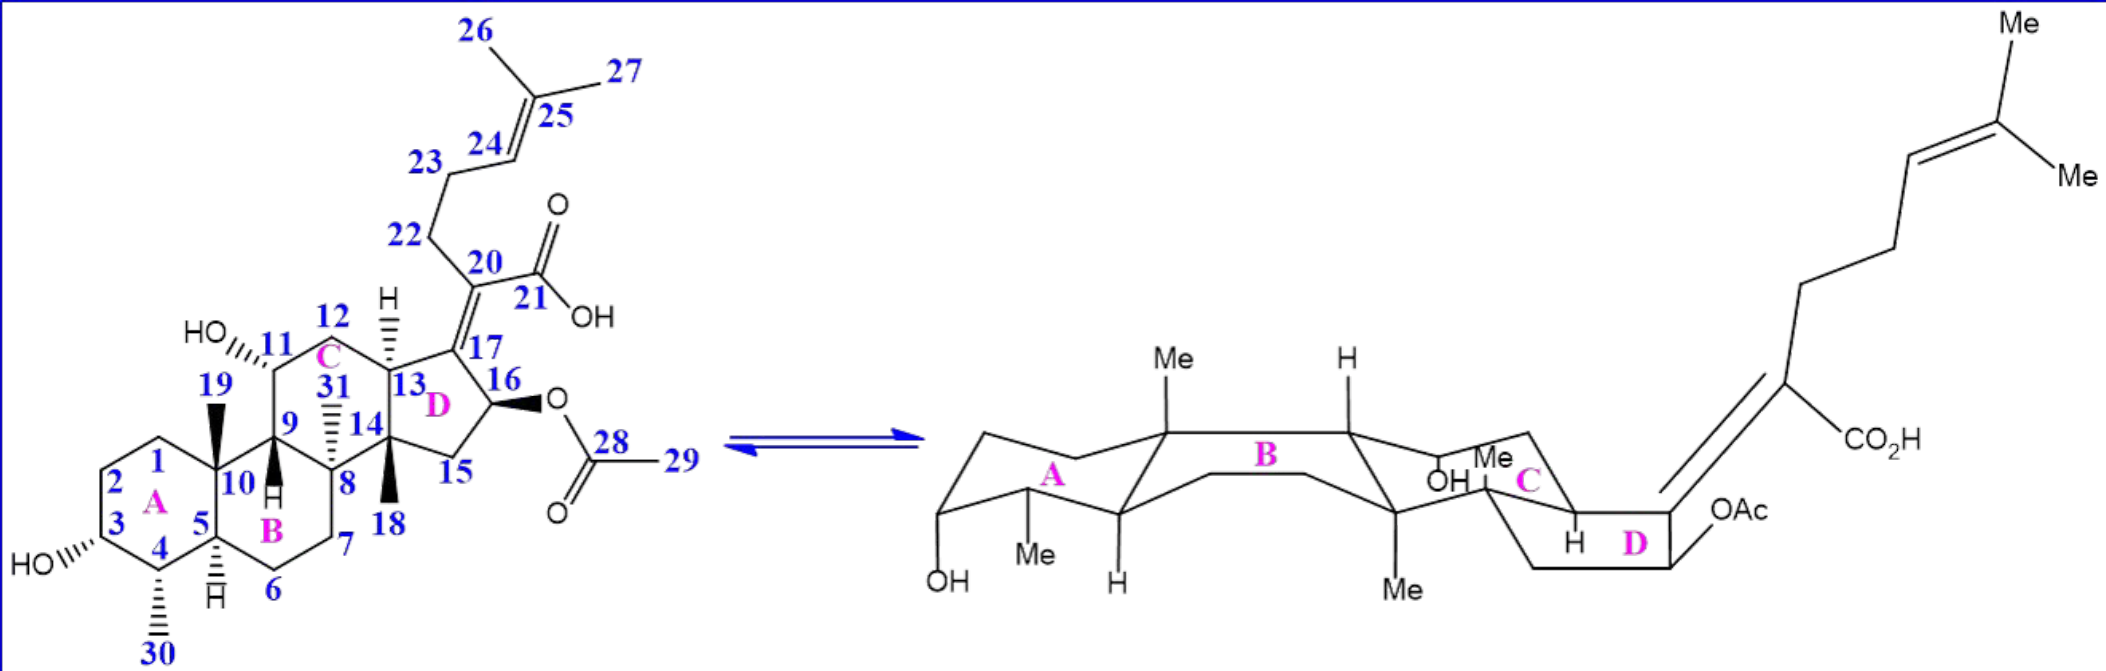

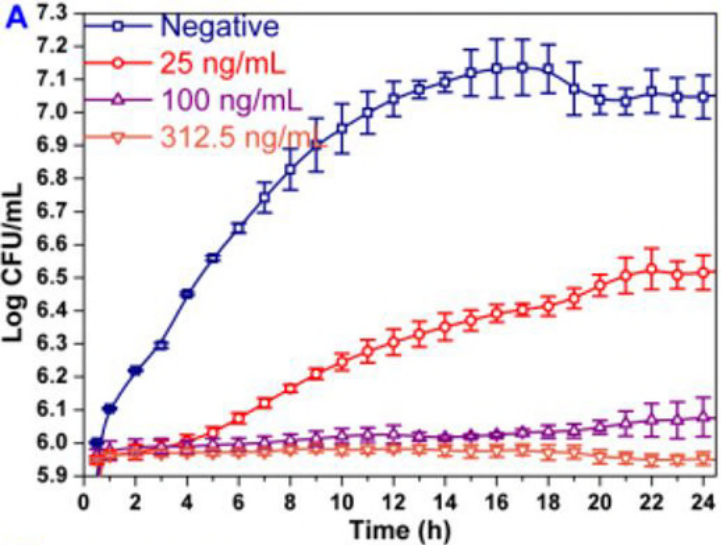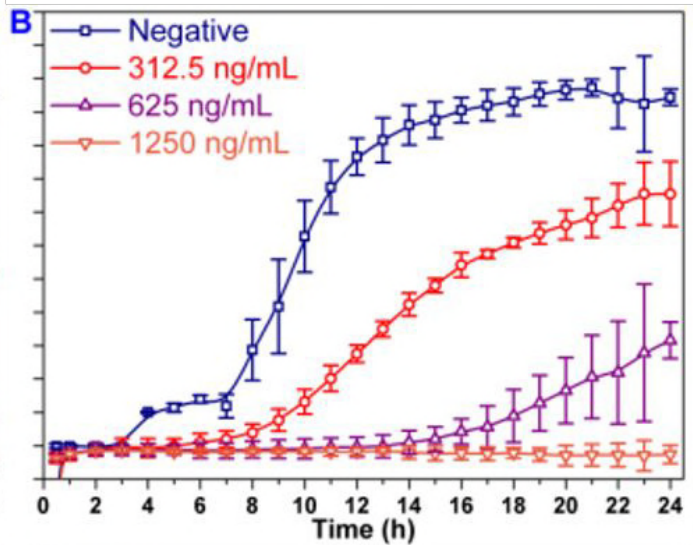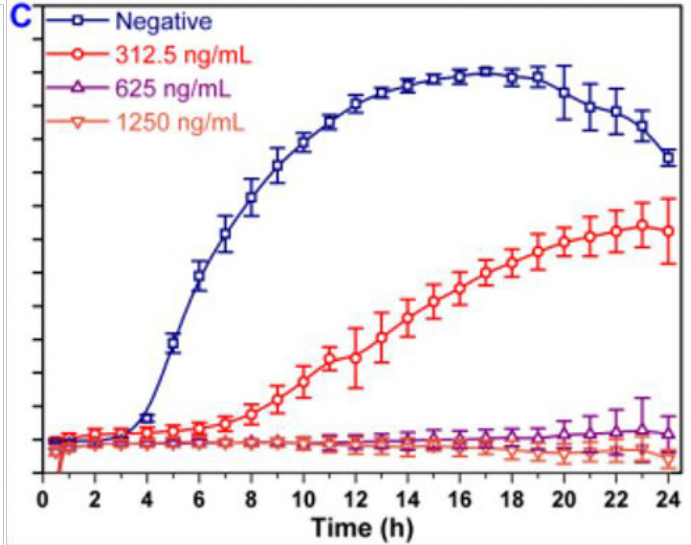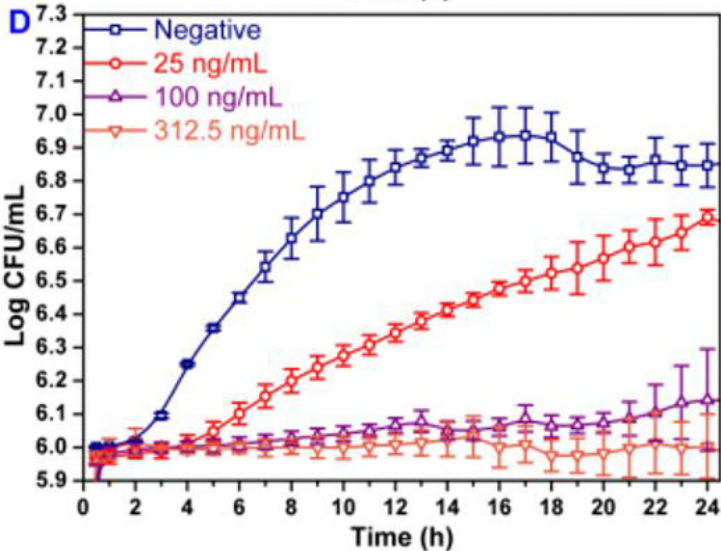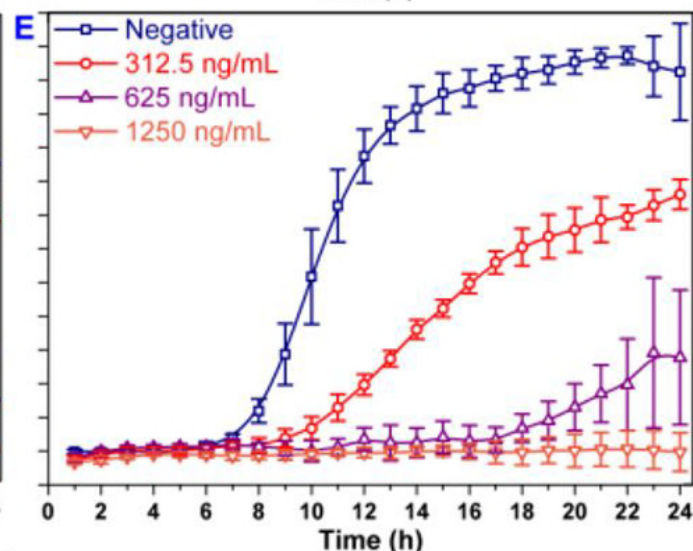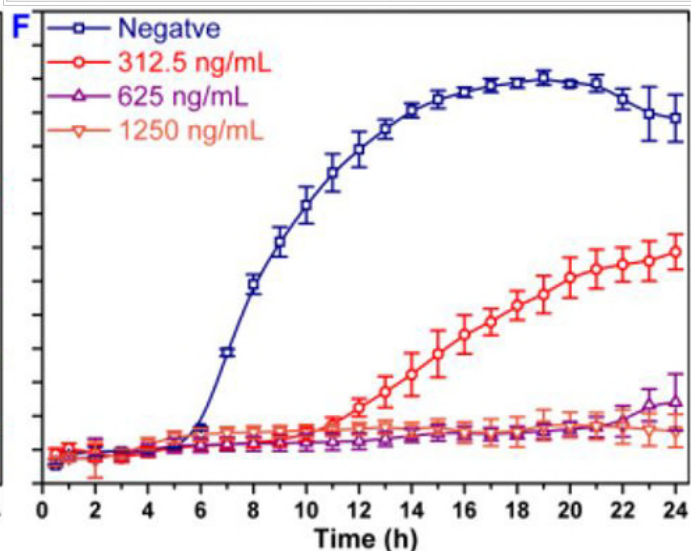

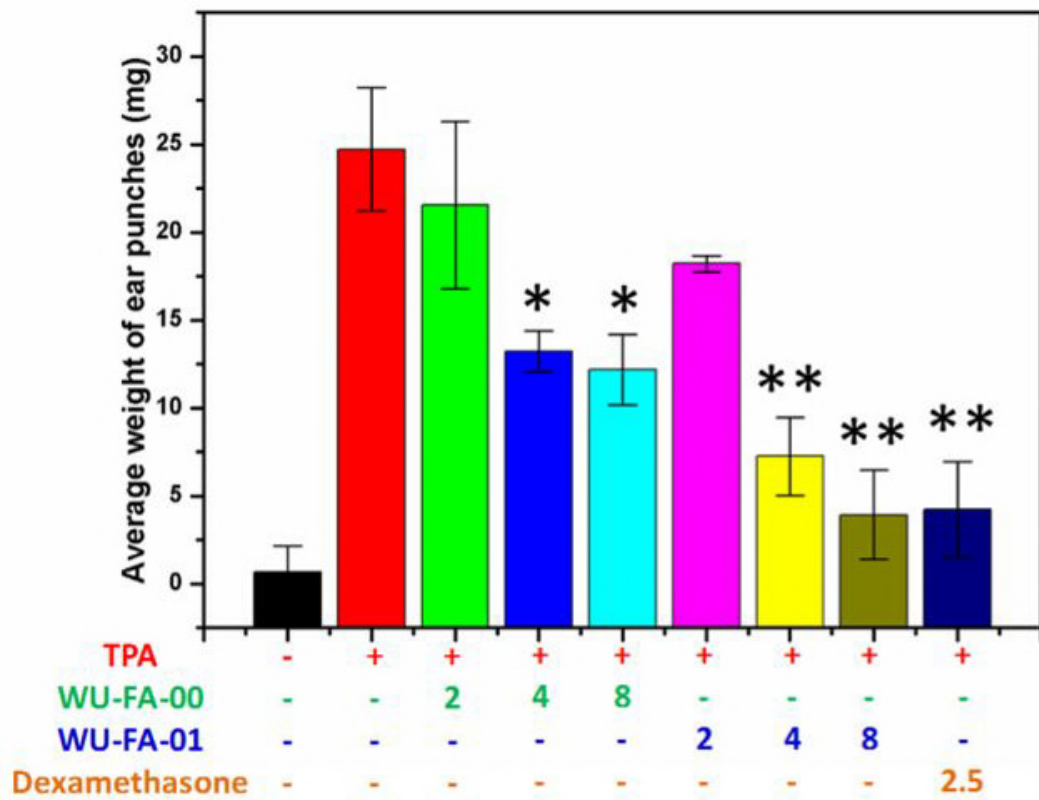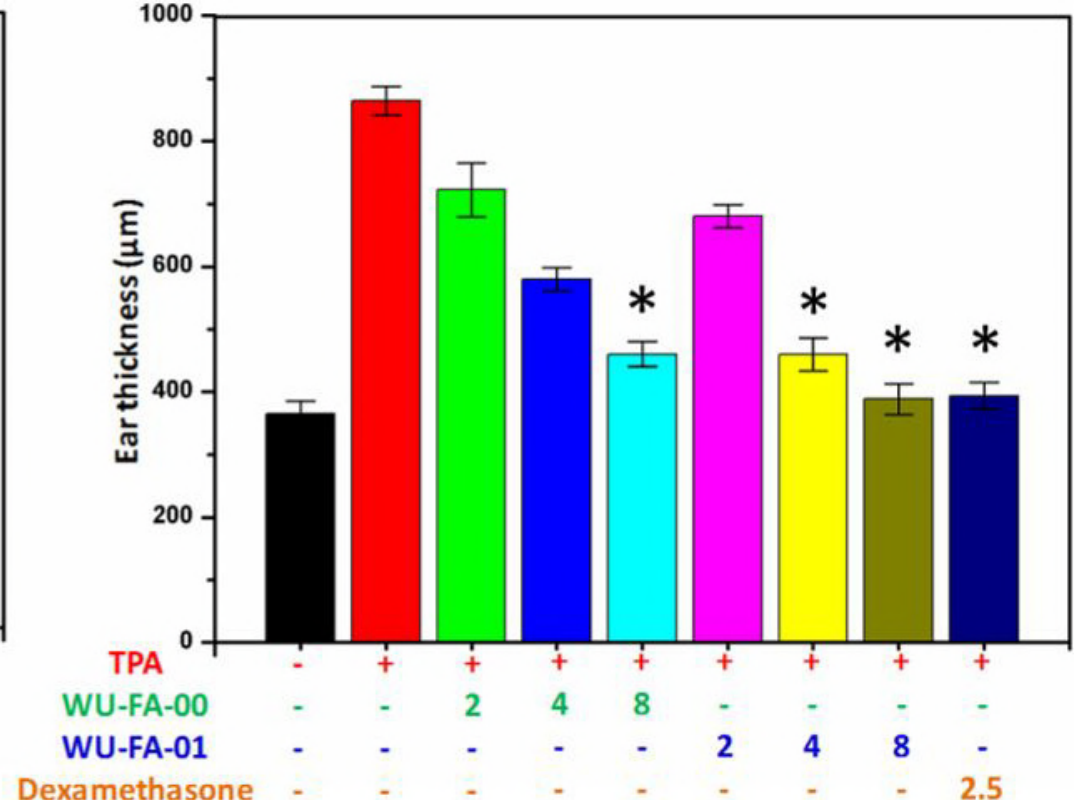



**Figure 5A**

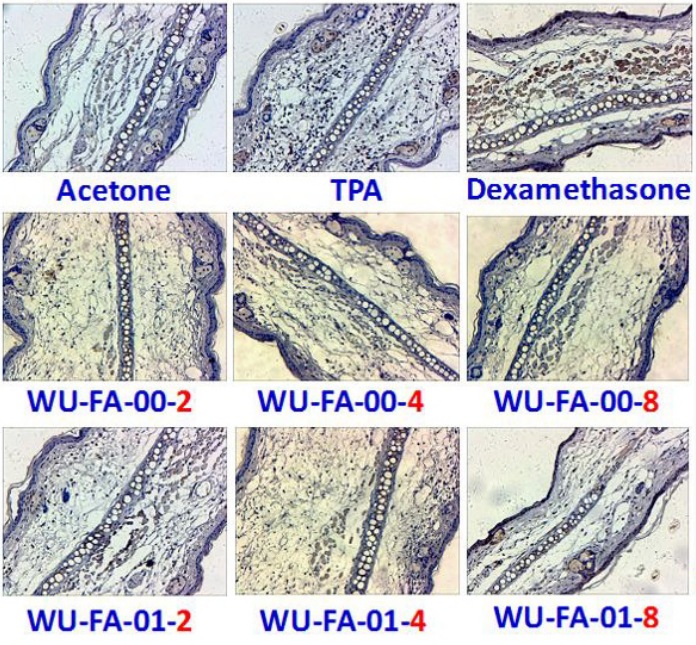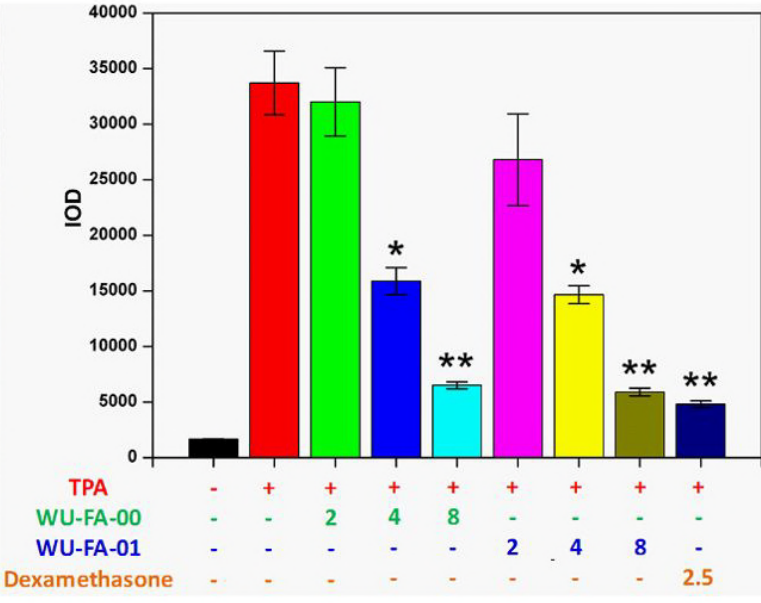

**Figure 5B**

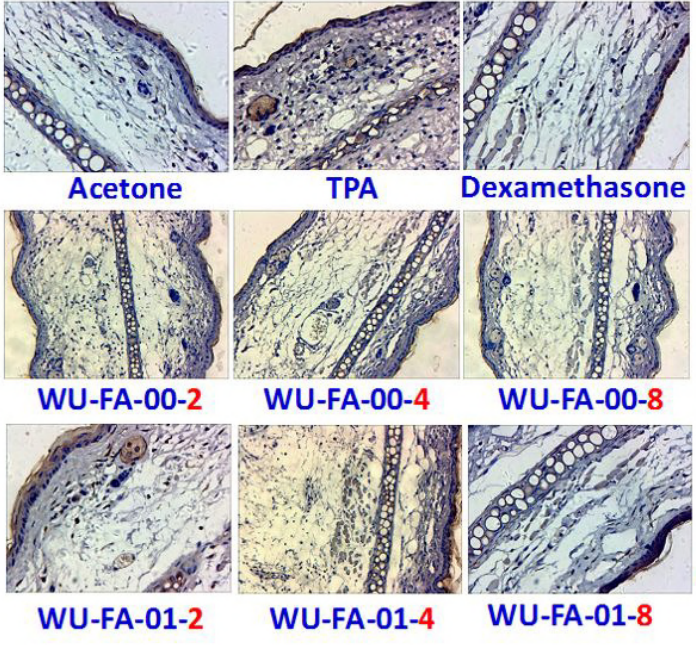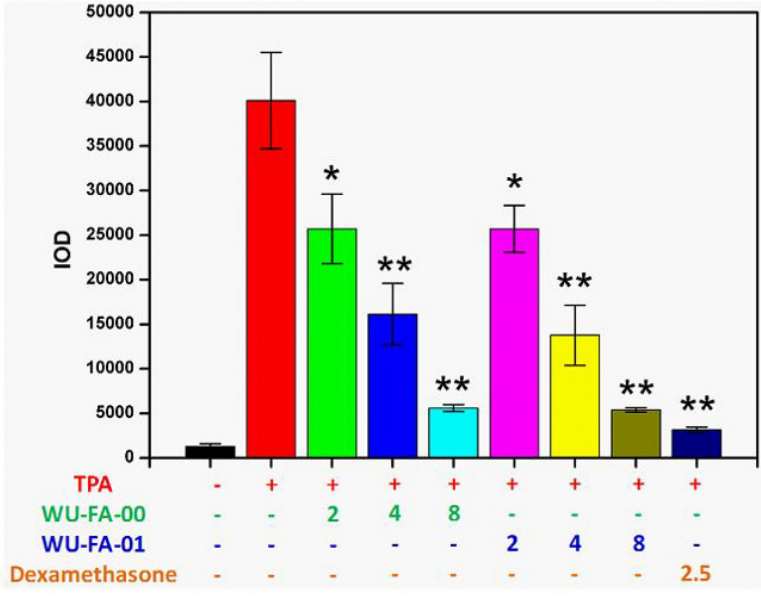

**Figure 5C**

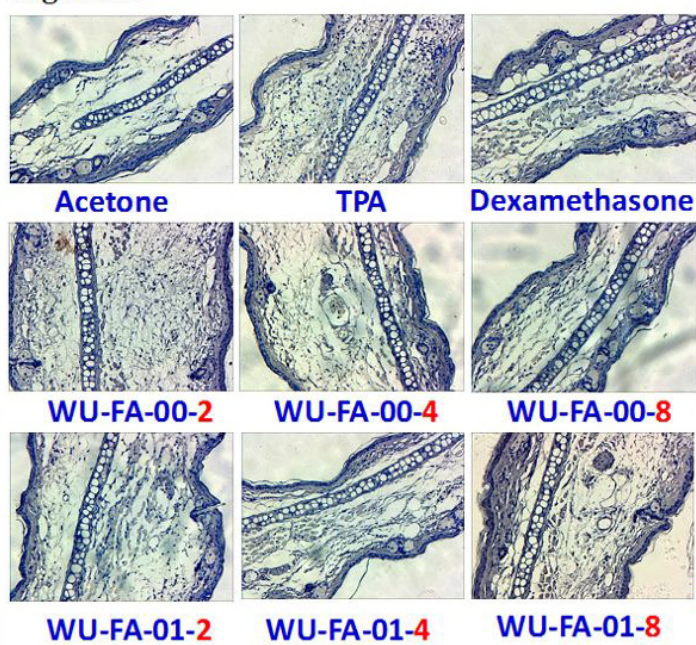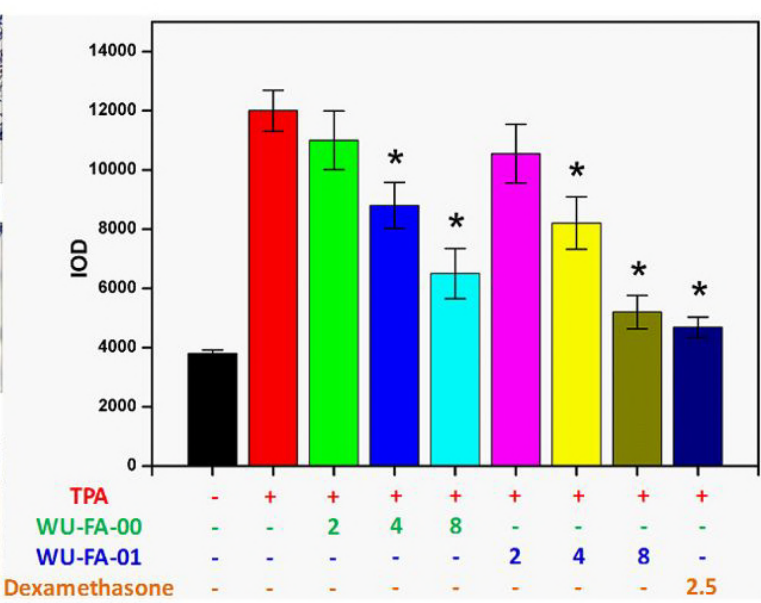

**Figure 6A**

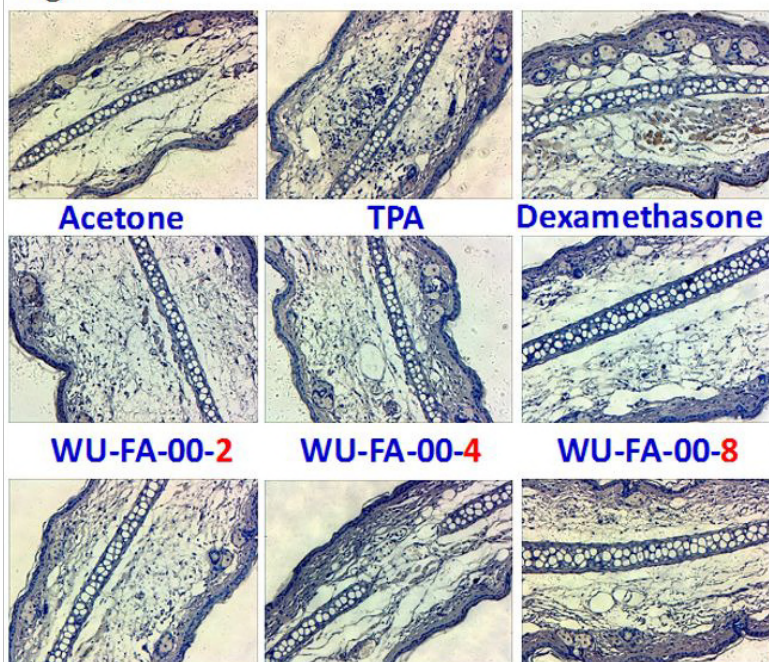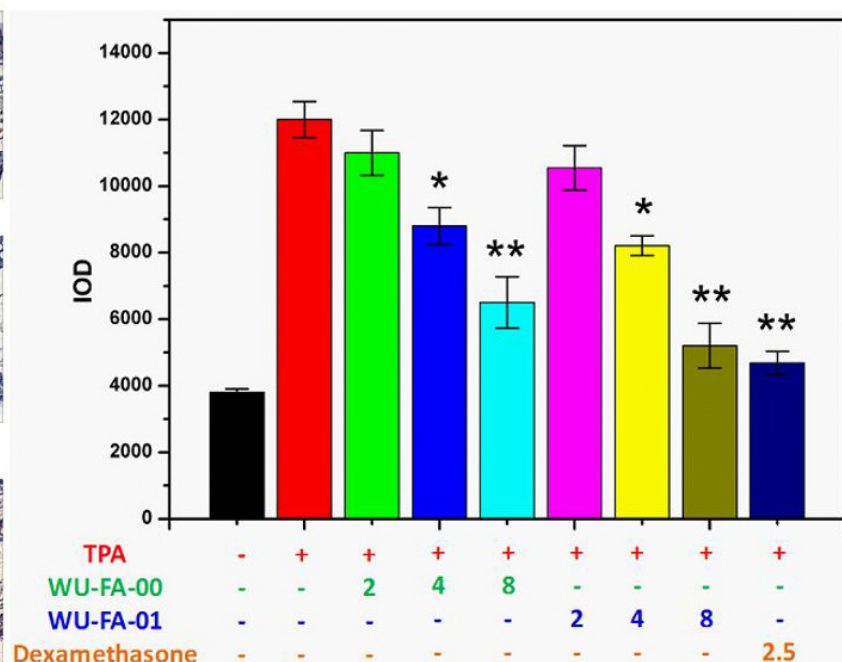

**Figure 6B**

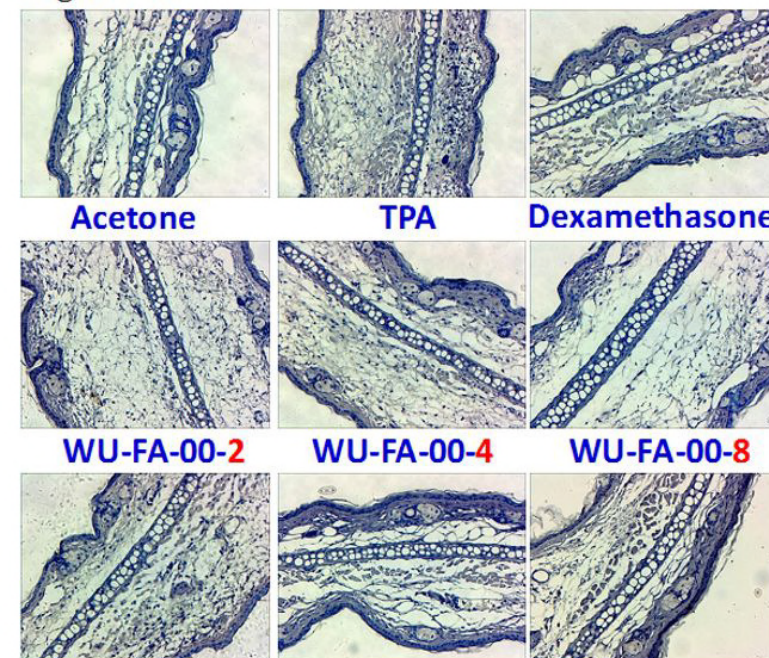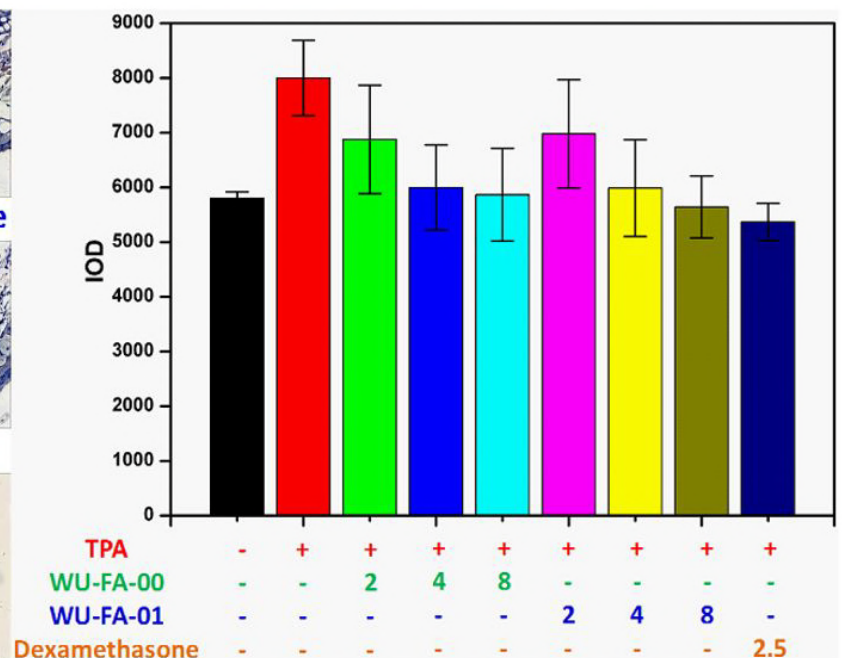

**Figure 6C**

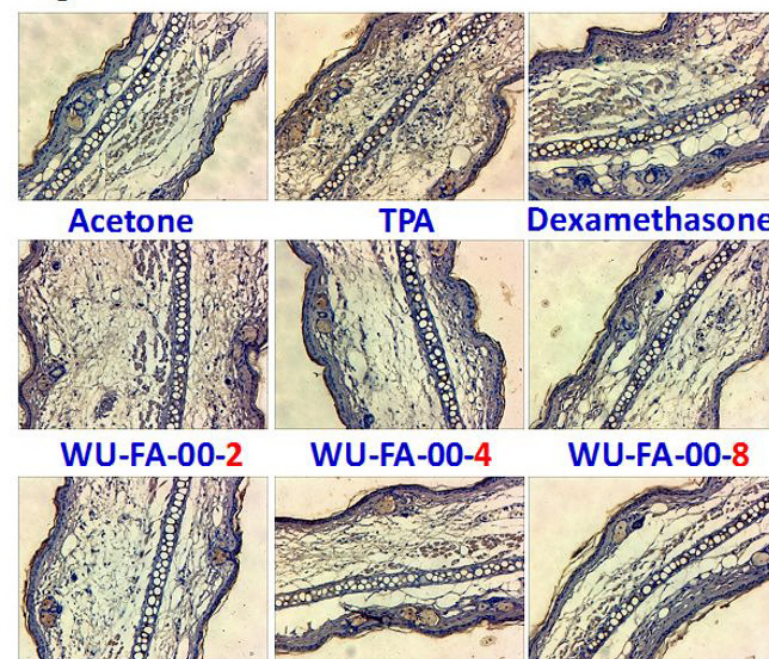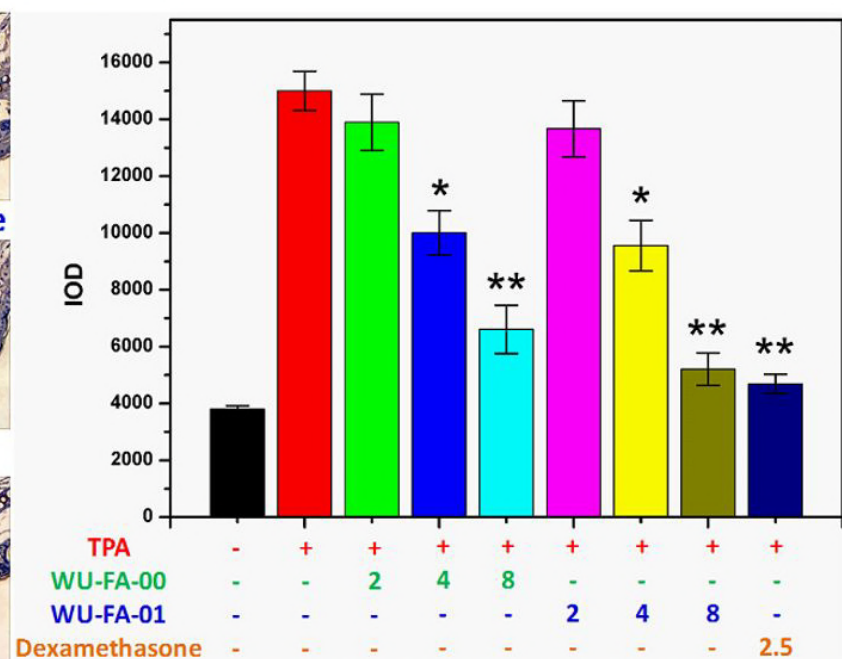

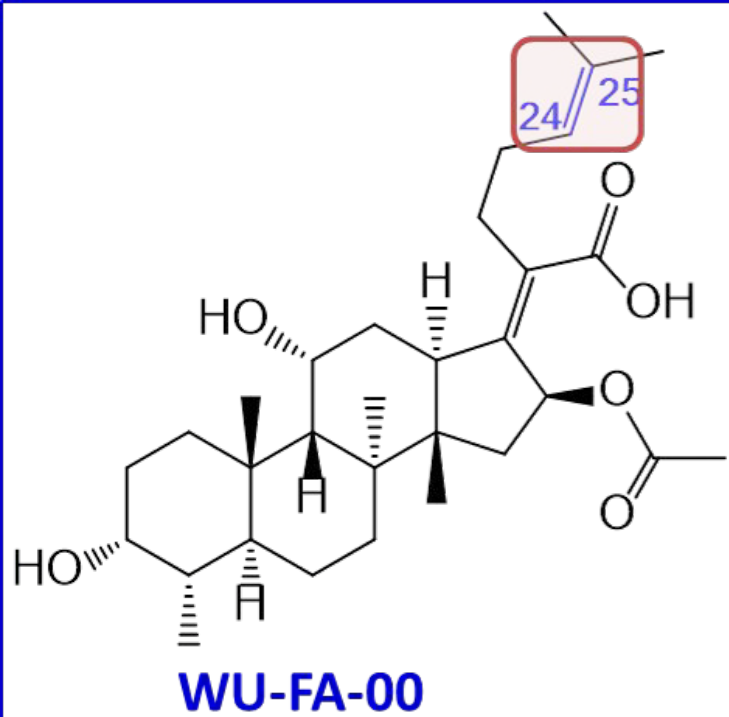

1) 5% palladium on calcium carbonate

2) H<sub>2</sub>

Ethanol

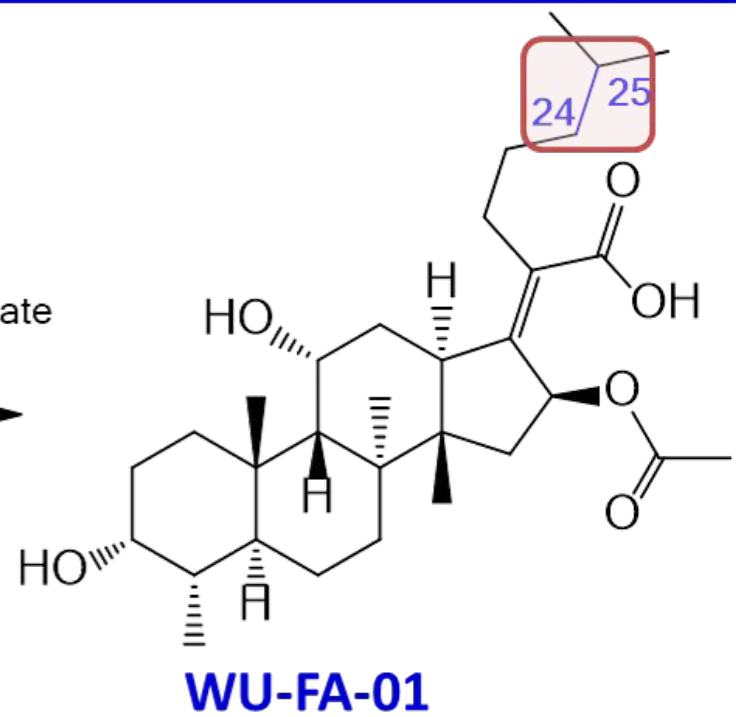



**Table 1 Antibacterial activity of WU-FA-00 and WU-FA-01 expressed in the inhibition zone (mm).**

| Compound                                          | WU-FA-00                                                                          |                  | WU-FA-01                                                                            |                  |
|---------------------------------------------------|-----------------------------------------------------------------------------------|------------------|-------------------------------------------------------------------------------------|------------------|
| Structure                                         | 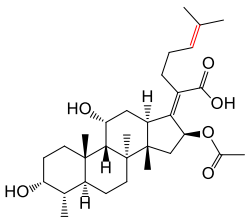 |                  |  |                  |
| Concentration ( $\mu\text{g/mL}$ )                | 25                                                                                | 12.5             | 25                                                                                  | 12.5             |
| Dosage (ng)                                       | 125                                                                               | 62.5             | 125                                                                                 | 62.5             |
| Bacterium                                         | Inhibition Zone (mm)                                                              |                  |                                                                                     |                  |
| <i>Staphylococcus aureus</i><br>(ATCC 6538)       | 23.09 $\pm$ 0.37                                                                  | 20.60 $\pm$ 0.40 | 23.08 $\pm$ 1.13                                                                    | 20.05 $\pm$ 0.30 |
| <i>Staphylococcus albus</i><br>(ATCC 29213)       | 21.48 $\pm$ 0.36                                                                  | 18.75 $\pm$ 0.44 | 19.93 $\pm$ 1.03                                                                    | 17.10 $\pm$ 0.14 |
| <i>Staphylococcus epidermidis</i><br>(ATCC 12228) | 24.22 $\pm$ 1.66                                                                  | 20.04 $\pm$ 0.35 | 22.91 $\pm$ 0.84                                                                    | 17.42 $\pm$ 0.40 |
| <i>Listeria monocytogenes</i><br>(ATCC 19115)     | 11.63 $\pm$ 1.33                                                                  | 10.44 $\pm$ 0.82 | 11.49 $\pm$ 0.41                                                                    | 10.55 $\pm$ 1.20 |
| <i>Streptococcus pneumoniae</i><br>(ATCC 49619)   | 8.22 $\pm$ 0.79                                                                   | 7.37 $\pm$ 1.23  | 9.39 $\pm$ 0.90                                                                     | 7.52 $\pm$ 1.11  |
| <i>Escherichia coli</i><br>(CMCC 44102)           | ND                                                                                | ND               | ND                                                                                  | ND               |

ND, not determined.

**Table 2 Antibacterial activities of WU-FA-00 and WU-FA-01 expressed in MIC and MBC (ng/mL).**

| Bacteria                  |                                                | Compounds |       |          |       |
|---------------------------|------------------------------------------------|-----------|-------|----------|-------|
|                           |                                                | WU-FA-00  |       | WU-FA-01 |       |
|                           |                                                | MIC       | MBC   | MIC      | MBC   |
|                           |                                                | ng/mL     |       | ng/mL    |       |
| Gram-positive<br>bacteria | <i>Staphylococcus aureus</i> (ATCC 6538)       | 100       | 312.5 | 100      | 200   |
|                           | <i>Staphylococcus albus</i> (ATCC 29213)       | 625       | 1250  | 625      | 1250  |
|                           | <i>Staphylococcus epidermidis</i> (ATCC 12228) | 625       | 1250  | 625      | 1250  |
|                           | <i>Listeria monocytogenes</i> (ATCC 19115)     | >1250     | >1250 | >1250    | >1250 |
|                           | <i>Streptococcus pneumoniae</i> (ATCC 49619)   | >1250     | >1250 | >1250    | >1250 |
| Gram-negative<br>bacteria | <i>Escherichia coli</i> (CMCC 44102)           | ND        | ND    | ND       | ND    |

MIC (ng/mL), minimum inhibitory concentration, i.e., the lowest concentration of the compound that completely inhibits the growth of bacteria.

MBC (ng/mL), minimum bacterial concentration, i.e., the lowest concentration of the compound that completely kills the bacteria.

ND, not determined.
